**Xpert MTB/XDR: A ten-color reflex assay suitable for point of care settings to detect isoniazid-, fluoroquinolone-, and second line injectable drug-resistance directly from *Mycobacterium tuberculosis* positive sputum.**

Yuan Cao<sup>1\*</sup>, Heta Parmar<sup>1\*</sup>, Rajiv L. Gaur<sup>2</sup>, Deanna Lieu<sup>2</sup>, Shobana Raghunath<sup>2</sup>, Nova Via<sup>2</sup>, Simone Battaglia<sup>3</sup>, Daniela M. Cirillo<sup>3</sup>, Claudia Denkinger<sup>4@</sup>, Sophia Georghiou<sup>4</sup>, Robert Kwiatkowski<sup>2</sup>, David Persing<sup>2</sup>, David Alland<sup>1#\*</sup>, Soumitesh Chakravorty<sup>1,2#\*</sup>.

**Affiliations:**

<sup>1</sup>New Jersey Medical School, Rutgers University, New Jersey, USA; <sup>2</sup>Cepheid Inc. California, USA; <sup>3</sup>San Raffaele Hospital, Milan, Italy; <sup>4</sup>Foundation for Innovative New Diagnostics, Geneva, Switzerland; <sup>3</sup>San Raffaele Hospital, Milan, Italy.

<sup>@</sup>Current address: Division of Tropical Medicine, Center of Infectious Diseases, University Hospital of Heidelberg, Germany.

Running title: Point of care assay for XDR tuberculosis

<sup>#</sup>Corresponding authors: [allandda@njms.rutgers.edu](mailto:allandda@njms.rutgers.edu) ; [soumitesh.chakravorty@cepheid.com](mailto:soumitesh.chakravorty@cepheid.com)

\*These authors contributed equally to this study. Author order was determined on the basis of seniority.

## 20 Abstract

21 We describe the design, development, analytical performance and a limited clinical evaluation of the 10-color  
22 Xpert MTB/XDR assay (CE-IVD only, not for sale in the US). This assay is intended as a reflex test to detect  
23 resistance to Isoniazid (INH), Fluoroquinolones (FLQ), Ethionamide (ETH) and Second Line Injectable Drugs  
24 Drugs (SLID) on unprocessed sputum samples and concentrated sputum sediments which are positive for  
25 *Mycobacterium tuberculosis*. The Xpert MTB/XDR assay simultaneously amplifies eight genes and promoter  
26 regions in *M. tuberculosis* and analyzes melting temperatures (Tms) using sloppy molecular beacon probes  
27 (SMB) to identify mutations associated with INH, FLQ, ETH and SLID resistance. Results can be obtained  
28 under 90 minutes and requires 10-color GeneXpert modules. The assay can differentiate low versus high-level  
29 resistance to INH and FLQ as well as cross-resistance versus individual resistance to SLIDs by identifying  
30 mutation-specific Tms or Tm patterns generated by the SMB probes. The assay has a Limit of Detection  
31 comparable to the Xpert MTB/RIF assay and successfully detected 16 clinically significant mutations in a  
32 challenge set of clinical isolate DNA. In a clinical study performed at two sites with 100 sputum and 214  
33 clinical isolates, the assay showed a sensitivity of 94-100% and a specificity of 100% for all drugs except for  
34 ETH when compared to sequencing. The sensitivity and specificity when compared to phenotypic drug  
35 susceptibility testing were in the same range. Used in combination with a primary tuberculosis diagnostic test,  
36 this assay is expected to expand the capacity for detection of drug-resistant tuberculosis.

## 39 Introduction

40 Drug-resistant *Mycobacterium tuberculosis* remains a significant threat to global Tuberculosis (TB) care  
41 and public health. The World Health Organization (WHO) has estimated that in 2017, 3.4% of new cases and  
42 18% of previously treated cases had rifampicin-resistant TB (RR-TB) or multidrug-resistant TB (MDR-TB),  
43 and as many as 8.5% of new TB cases had extensively drug-resistant TB (XDR-TB)(1). MDR-TB is caused by  
44 *M. tuberculosis* that is resistant to Isoniazid (INH) and Rifampicin (RIF), and XDR-TB is additionally resistant  
45 to at least one of the Fluoroquinolones (FLQ) and Second Line Injectable Drugs (SLIDs) including Amikacin  
46 (AMK), Capreomycin (CAP), and Kanamycin (KAN). Phenotypic drug susceptibility testing (P-DST), the  
47 current gold standard for identifying drug resistance in *M. tuberculosis*, takes 6 to 8 weeks to provide  
48 definitive results and poses a bio-hazard risk for laboratory personnel, especially when working with XDR  
49 strains. Thus, treatment is often empirically based on other factors such as past medical history or local  
50 prevalence of resistance (2, 3). Delays in appropriate treatment can increase both mortality and transmission of  
51 drug resistant strains.

52 The Xpert MTB/RIF ( *in vitro* diagnostic use only) assay and its more advanced version, the Xpert  
53 MTB/RIF Ultra ( CE-IVD only; not for sale in the US) assay (Cepheid, CA, USA) were designed to  
54 simultaneously detect the presence of *M. tuberculosis* and RIF-resistance in an integrated and fully automated  
55 system directly from sputum. These assays can be used with only minimal training at point of care settings, (4, 5)  
56 where widespread implementation has led to an overall decrease in TB incidence in some studies (6) and  
57 increased notifications of RIF-resistance in others (7). However, these assays only detect RIF-resistance, and it  
58 has been shown that selection of TB treatment regimens based only on detection of RIF resistance can result in  
59 suboptimal therapy for 49% of patients with MDR or XDR TB (8). Thus, additional tests that identify resistance  
60 to INH, FLQs and SLIDs equally rapidly in similar point of care settings are also necessary. The MTBDR*plus*  
61 and MTBDR*sl* version 2.0 (HAIN Life Sciences, Germany) assays are currently recommended by WHO  
62 as molecular tests to detect INH and RIF, and FLQ and SLID resistance, respectively. However, these

63 assays are not suitable for near patient or point of care testing, as it requires a sophisticated laboratory  
64 settings (9).

65 We had previously developed and validated a prototype cartridge-based assay that detected *M.*  
66 *tuberculosis* resistant to INH, the FLQs and SLID directly from sputum using a multiplexed 10 color molecular  
67 test. This cartridge was a proof of principle initial prototype, which underscored our technical capability to  
68 develop a functional 10 color reflex test on sputum samples positive for *M. tuberculosis* by primary diagnostic  
69 tests, including the Xpert MTB/RIF and the Xpert MTB/RIF Ultra assay. The cartridge detected resistance with  
70 high sensitivity and specificity directly from the sputum of TB patients in less than 2 hours (10, 11). However,  
71 since the development of the prototype cartridge, mutations in *fabG1* and *oxyR-ahpC* intergenic regions have  
72 also been shown to account for INH resistance (12) (13); mutations at the -14 position in the *eis* promoter  
73 region have been shown to confer resistance to both KAN and AMK (other *eis* promoter mutations only confer  
74 resistance to KAN) (14, 15); while the mutation “a1401g” in *rrs* gene confers cross resistance to AMK, KAN  
75 and CAP (16, 17); and mutations in the quinolone resistance-determining region (QRDR) in *gyrA* have been  
76 subdivided into mutations that cause low-level resistance (*gyrA* A90V, *gyrA* S91P, and *gyrA* D94A) and other  
77 mutations that elevate MICs to later-generation of FLQ drugs more substantially (18-20). The MIC differences  
78 caused by these two different categories of mutations have also been shown to have different clinical outcomes  
79 when a FLQ is used as part of MDR/XDR therapy (21, 22). In the current study, we describe a new, more  
80 advanced test, the Xpert MTB/XDR assay ( CE-IVD only, not for sale in the US), that was redesigned to  
81 improve mutation coverage for INH, differentiate low level INH resistance from higher level resistance, identify  
82 Ethionamide (ETH) resistance, distinguish between low and high levels of resistance to FLQs, and identify  
83 cross resistance versus individual resistance to the SLIDs. We have also improved the overall sensitivity of the  
84 assay and reduced the time to result to less than 90 minutes after the run is started. Here we describe the  
85 development and initial clinical evaluation of this assay along with the additional attributes to improve assay  
86 performance.

## 87 Results

88 **Detection and differentiation of *gyrA* QRDR mutations.** We redesigned our previous assay in order to  
89 be able to specifically identify the *gyrA* QRDR mutations A90V, S91P and D94A that are associated with low  
90 level FLQ resistance (19, 23), and to distinguish them from the other QRDR mutations that are associated with  
91 higher level resistance. We designed three overlapping Sloppy molecular beacon (SMB) probes with slightly  
92 varying sequences against the *gyrA* QRDR. These three *gyrA* probes were designed to generate specific “three  
93 T<sub>m</sub> window” patterns, which identify and distinguish each of the above mentioned QRDR mutations when they  
94 occur in the absence of other *gyrA* QRDR mutations. We designated one wild type (WT) window and multiple  
95 mutant windows for each of the *gyrA* probes. The *gyrA*1 and *gyrA*3 probes were assigned three mutant  
96 windows (MutA, MutB and MutC), and the *gyrA*2 probe two mutant windows (MutA and MutB). The multiple  
97 mutant and the single WT T<sub>m</sub> for each probe can theoretically generate nearly 48 different “three T<sub>m</sub> window”  
98 combinations specific to the QRDR mutations and the WT sequence. The WT QRDR sequence generates a  
99 “WT-WT-WT” T<sub>m</sub> window pattern for the three probes and the mutant sequences have one or more of the WT  
100 T<sub>m</sub> values replaced by mutant T<sub>m</sub> (Table 1). Thus, the three overlapping probes with different binding affinities  
101 to the *gyrA* QRDR enabled us to generate tri-window T<sub>m</sub> patterns specific to each of A90V, S91P and D94A  
102 mutations, namely “MutB-MutA-MutB”; “MutB-MutA-MutC” and “MutA-MutA-WT” respectively for the  
103 “*gyrA*1-*gyrA*2-*gyrA*3” probes as shown in Table 1. Each pattern is specific for one of these three mutations,  
104 enabling the identification of low FLQ resistance. Additionally, we designed the probes to be agnostic to the  
105 Ser/Thr polymorphism in the codon 95, so that identical T<sub>m</sub> patterns for the WT and all the mutant sequences  
106 are generated for both these polymorphisms. We tested *gyrA* QRDR containing plasmids bearing 11 different  
107 *gyrA* mutation types for both the 95S and 95T polymorphisms as a challenge set as shown in Table 1. The  
108 probes successfully identified and differentiated the individual low resistance-conferring mutations from other  
109 mutations by their different T<sub>m</sub> signatures (falling in different T<sub>m</sub> windows), as indicated in Table 1.

**Mutant panel challenge.** We assessed the ability of the Xpert MTB/XDR assay to detect drug resistance associated mutations in clinical *M. tuberculosis* isolates. A panel of 14 clinical isolates with canonical mutations in the target genes and promoter regions known to be associated with clinical INH, ETH, FLQ, and SLID resistance were tested (Table 2). All the mutations were confirmed by P-DST and Sanger sequencing of each of the target genes and promoter regions. The assay was able to detect all the mutations (except a single *gyrB* mutation) and correctly determine the specific drug resistance profile for all the isolates tested. The assay correctly detected low-INH and ETH resistance conferring mutation (*inhA* c-15t) and all the other INH resistance-conferring mutations in *katG* (S315T), *fabG1* (g603a) and *ahpC* (g-48a, g-6a). The assay also detected all the *gyrA* QRDR mutations, including a triple and a double mutant (Table 2). The assay resulted in correct “low FLQ resistance detected” calls for A90V, S91P and D94A mutations that are associated with low-level FLQ resistance and resulted in the correct “FLQ resistance detected” call for D94G and D94Y mutations. Isolates with mutations associated with SLID resistance in *eis* (g-10a, c-12t) and *rrs* (a1410g) genes were also identified correctly. Although the assay was able to correctly determine the resistance profile of all 14 isolates, it was not able to identify the *gyrB* mutation T539N because the T<sub>m</sub> difference (dT<sub>m</sub>) between the WT T<sub>m</sub> and this mutation was 1.1°C, which did not result in the T<sub>m</sub> falling in the mutant window for *gyrB* probe. However, as the isolate also had an A90V mutation, it was identified as a low FLQ resistant sample. The *gyrB* T539N mutation has been reported to be present at a very low frequency in FLQ resistant isolates (24) and functional genetic studies have demonstrated that introduction of this mutation into the wild type *M. tuberculosis* genome does not result in any appreciable increase in MIC to third-generation FLQ (25). Thus, the assay’s failure to detect *gyrB* T539N would not be expected to affect sensitivity for detecting FLQ resistance. The specific 10 T<sub>m</sub> profiles corresponding to each mutation, which also enables specific identification of each genotype associated with the target genes, are shown in Table 2.

**Xpert MTB/XDR assay has a Limit of Detection (LoD) that is comparable to Xpert MTB/RIF for *M. tuberculosis* detection.** The Xpert MTB/XDR assay includes a separate call out for *M. tuberculosis*

134 detection, which is based on the identification of an *inhA* probe T<sub>m</sub> in either WT or mutant windows. Positive  
135 detection of *M. tuberculosis* is required before the assay software will generate a resistance “DETECTED” or  
136 ‘NOT DETECTED” call. Thus, if the *inhA* probe does not result in a detectable T<sub>m</sub> (WT or mutant), the result  
137 will be “MTB NOT DETECTED”, and no resistance result output will be available irrespective of whether T<sub>m</sub>  
138 values are generated from the other targets in the assay. The Xpert MTB/XDR assay is designed to be run as a  
139 reflex test after initial testing has identified the presence of *M. tuberculosis* in the sample. Thus, our preference  
140 was to ensure that the Xpert MTB/XDR assay was at least as sensitive as the Xpert MTB/RIF assay in its *M.*  
141 *tuberculosis* detection function. The LoD of *M. tuberculosis* for the Xpert MTB/XDR assay was determined by  
142 performing a head-to-head comparison with the Xpert MTB/RIF assay, using the same *M. tuberculosis* H37Rv  
143 stock cultures. Six concentrations (200, 100, 80, 60, 20 and 10 CFU/mL) of *M. tuberculosis* strain H37Rv  
144 mc<sup>2</sup>6030 were spiked into pooled sputum samples confirmed to be *M. tuberculosis* negative by the Xpert  
145 MTB/RIF Ultra assay and tested in parallel by the Xpert MTB/RIF and the Xpert MTB/XDR assays in 20  
146 replicates per concentration. The LoD calculated by Probit analysis was 71.9 CFU/mL (95% CI 58, 100) for the  
147 Xpert MTB/XDR assay and 86.9 CFU/mL 95% CI (72, 110) for the Xpert MTB/RIF assay (Figure 1). The LoD  
148 analyzed for each drug susceptibility call separately was 79.8 CFU/mL for INH, 95.5 CFU/mL for FLQ, 92.2  
149 CFU/mL for AMK, 74.5 CFU/mL for KAN and 74.8 CFU/mL for CAP and 71.9 CFU/mL for ETH. Separate  
150 LoD studies were also performed at a different laboratory setting with two different lots of Xpert MTB/XDR  
151 cartridges and *M. bovis* BCG stock instead of H37Rv to address the reproducibility of the initial LoD estimate.  
152 This study resulted in higher LoD estimates of 126-136 CFU/mL, when compared to the initial study using  
153 H37Rv stock, but was still comparable to the initially published Xpert MTB/RIF LoD (37). This minor  
154 difference in LoD estimates may be attributed to differences in cartridge lots and two different CFU stocks used  
155 to generate contrived samples. When we tested the LoD on NALC-NaOH concentrated sputum samples using  
156 spiked *M. bovis* BCG stock, the LoD was observed to be 86 CFU/mL, which is similar to the LoD obtained with  
157 direct sputum using H37Rv mc<sup>2</sup>6030 stock. Both the studies with the *M. bovis* BCG stock are described in  
158 detail in the supplementary results section.

159 **Ability to detect a genetically diverse set of *M. tuberculosis* complex strains.** To assess the capacity  
160 of the Xpert MTB/XDR assay to detect different species in the *M. tuberculosis* complex (MTBC), 9 *M.*  
161 *tuberculosis* complex species including *M. tuberculosis* strain H37Rv, *M. bovis*, *M. africanum*, *M. canetti*, and  
162 *M. microti* were tested by the Xpert MTB/XDR assay. These isolates were selected to be phylogenetically  
163 diverse with one representative strain across all major lineages of *M. tuberculosis* (26). All samples were  
164 detected as MTB positive (Table 3). *M. canetti* showed a *gyrB* T<sub>m</sub> of 67.8<sup>0</sup>C which was a shift of -1.8<sup>0</sup>C from  
165 the mean WT T<sub>m</sub> of 69.6<sup>0</sup>C as shown in Table 3 due to a polymorphism c/t in codon 533 in the *gyrB* gene  
166 present in some strains of *M. canetti* (27). However, this did not cause any false FLQ resistant calls since the  
167 *gyrB* T<sub>m</sub> remained within the defined WT T<sub>m</sub> window for *gyrB* probe. All of the other *M. tuberculosis* complex  
168 species tested generated WT T<sub>m</sub> values identical to those of H37Rv and “Resistance NOT DETECTED” result  
169 output for all the drugs.

170 **Analytical specificity and cross reactivity.** The specificity of the assay was assessed by testing 30  
171 NTMs, 19 Gram-positive and Gram-negative bacteria, along with *Candida albicans* at 10<sup>6</sup> to 10<sup>7</sup> CFU/mL  
172 (Supplementary tables S1 and S2). All of the samples generated “MTB NOT DETECTED” results by the Xpert  
173 MTB/XDR assay, which specifically requires that the *inhA* probe generate a T<sub>m</sub> in either the WT or MUT  
174 window to be called *M. tuberculosis*-positive. All of the NTM species tested, except *M. triviale*, generated *rrs*  
175 WT T<sub>m</sub> values, which was expected because the target region of *rrs* gene is conserved among most  
176 Mycobacterium species (Supplementary table S1). The *rrs* WT T<sub>m</sub> values were also obtained from *Citrobacter*  
177 *freundii*, *Corynebacterium xerosis*, *Enterobacter cloacae*, *Nocardia asteroides*, *Staphylococcus epidermidis*,  
178 *Streptococcus pyogenes* and *Candida albicans* indicating *rrs* primer/probe sequence overlap with the 16S  
179 ribosomal gene in these strains (Supplementary table S2). None of the strains was misidentified as *M.*  
180 *tuberculosis* positive due to the absence of any *inhA* promoter T<sub>m</sub>. *M. gastri*, *M. gordonae*, and *M. xenopi*  
181 showed weak T<sub>m</sub> peaks in the *gyrA1* MutB T<sub>m</sub> window and *M. interjectum* generated a *gyrB2* WT T<sub>m</sub>



(Supplementary table S1). The rest of the targets did not cross-react in any of the NTMs. Very weak *gyrA* probe cross-reactivity was observed with a few additional bacterial species (Supplementary table S2).

Since weak *gyrA* mutant Tm peaks were observed for some of the NTM species, we performed spiking experiments with BCG and NTM mixtures to simulate the clinical scenario of a tuberculosis patient who is also infected with an NTM. Studies were then undertaken to test whether this type of dual infection could generate a false-positive FLQ resistance call. High concentrations ( $10^6$  CFU/mL) of 12 clinically relevant NTM species were mixed with a low concentration of *M. bovis* BCG (408 CFU/mL, i.e. approximately 3X LoD) and tested with the Xpert MTB/XDR assay (Supplementary table S3). None of the NTMs tested in these mixtures generated a false FLQ resistance calls. However, we did observe that one strain of *M. marinum* (ATCC 0927) interfered with the *gyrA* signal produced by the *M. tuberculosis* target resulting in the suppression of the Tm generated by at least one of the *gyrA* probe resulting in a “FLQ Resistance INDETERMINATE” call. At  $10^6$  CFU/mL all the 4 replicates tested, generated Indeterminate calls for FLQ and at  $10^5$  CFU/ml, 2 of 4 replicates resulted in indeterminate calls. This suppression only occurred when samples were spiked with  $10^5$  *M. marinum* CFU/mL or above. With *M. marinum* ATCC 0927 spiked at  $10^4$  CFU/mL, no interference was observed and the correct “FLQ Resistance NOT DETECTED” call was observed. To the best of our knowledge, there have been no reports of pulmonary infections caused by co-infection with *M. tuberculosis* and *M. marinum* and thus this interference may not be clinically relevant, at least for pulmonary TB cases.

**Detection of hetero-resistance.** It is estimated that about 20% to 45% of XDR cases contain a mixed population of susceptible and resistant strains, i.e. are hetero-resistant (28-31). We have shown previously that SMB assays can efficiently detect WT and mutant DNA mixtures by generating double Tm peaks corresponding to WT and mutant DNA sequences (10). To assess the performance of the Xpert MTB/XDR assay to detect mutations in hetero-resistant samples, *E. coli* cells transfected with plasmids containing WT or mutant XDR target sequences were used. A series of cell mixtures containing 0%, 10%, 15%, 20%, 25%, 50%, 60%, 75%, 90% and 100% of mutant was tested against a background of cells with WT sequences in replicates

of three. The total amount of cells tested in each mixture was fixed at 10,000 cells/mL. We used this approach to test mixtures of WT cells and cells containing the mutations: c(-15)t in the *inhA* promoter, S513T in the *katG* gene, g609a in *fabG1*, c(-39)t in *oxyR-ahpC* region, D94G in the *gyrA*, E540D in *gyrB*, a1401g in *rrs*, and c(-14)t in the *eis* promoter. Resistance was detected when the mutant Tm could be detected in presence of the WT background and “Resistance NOT DETECTED” calls were made when the mutant Tm was undetectable and only WT Tm was detected (Figure 2). For detection of *fabG1*, *katG* or *inhA* promoter mutations, our results showed that INH-R was detected in mixtures containing as little as 20% mutant cells in 80% of WT cells. However, cells containing an *ahpC* mutant could not be detected unless they were present in at least 75% of the mixture. FLQ-R was detected in mixtures that contained as little as 25% of the D94G mutation; however, mixtures containing the *gyrB* mutation were only detected in mixtures that contained 60% or more of the mutant sequence. SLID resistance was detected in mixtures that contained as little as 60% of the *rrs* or the *eis* promoter mutations. Below these levels, resistance was not detected, since the mutant Tms could not be identified against the WT Tm background as shown in figure 2.

We also evaluated the ability of the assay to accurately detect the three low FLQ resistance-associated mutations, A90V, S91P and D94A, when present as a mixture with WT sequence. We tested three replicates from each mixture, containing 0%, 10%, 20%, 30%, 40%, 50% and 100% mutant cells in a background of WT cells in a total mixture of 5000 cells. We found that the assay was not able to detect low FLQ resistance for all the A90V and S91P mixtures we tested and generated either a “FLQ Resistance DETECTED” call or “FLQ Resistance NOT DETECTED” call. In the former case, the presence of Tm values in both WT and MUT windows produced a Tm pattern that was consistent with “FLQ Resistance DETECTED” call, and in the latter case, there was only WT Tm present. A “FLQ Resistance DETECTED” call was made for S91P/WT mixtures down to as little as 20% S91P. Below that concentration, S91P/WT mixtures produced a “FLQ Resistance NOT DETECTED” call, since no mutant Tm could be detected. A “FLQ Resistance Detected” call was made for A90V/WT mixtures down to as little as 20% - 50% A90V and mixtures with less than 20% A90V produced a

230 “FLQ Resistance NOT DETECTED” call. In contrast, with the D94A mutation, the assay was able to correctly  
231 detect low-level FLQ resistance in hetero-resistant samples containing at least 50% D94A mutant cells mixed  
232 with 50% WT cells in all three replicates tested, due to the correct D94A specific T<sub>m</sub> signature (MutA-MutA-  
233 WT) being present. Two of three replicates containing 40% D94A produced a “Low FLQ Resistance  
234 DETECTED” call and one replicate produced “FLQ Resistance DETECTED” call. At D94A/WT mixtures  
235 below 40% D94A, the assay was unable to detect the presence of FLQ specific mutations (Data not Shown).  
236 Thus, the assay demonstrates a substantial loss in the ability to distinguish low- FLQ resistance conferring  
237 A90V and S91P mutations from other QRDR mutations, when these two mutations are present along with WT  
238 sequence, but its overall ability to identify FLQ resistance is not affected.

239 **Performance on sputum samples and clinical isolates.** A limited clinical study was performed at two  
240 different testing sites with a total of 100 *M. tuberculosis* positive frozen sputum and 214 clinical isolates from  
241 de-identified patients with XDR TB. The sensitivity and the specificity of the assay for detecting resistance to  
242 INH, ETH, FLQ and SLIDs on this sample set were estimated by individually comparing to the two different  
243 reference standards: P-DST and DNA sequencing. The capacity of the assay to accurately detect the mutations  
244 in the target genes was also estimated. The results from 105 of 107 clinical isolates and all the 50 sputum  
245 samples were available from site 1 and the results from 106 out of 107 isolates and 49 of the 50 sputum samples  
246 were available from site 2, which allowed us to include 310 of the 314 samples for the final analysis. Any  
247 “Indeterminate” result for any drug targets and samples with missing or ambiguous P-DST and/or sequencing  
248 results were excluded from the analysis. Excluding such samples, P-DST results were available for 309 samples  
249 for INH, 306 samples for KAN, 305 samples for each of FLQ and CAP, 303 samples for AMK and 265 samples  
250 for ETH. Similarly, sequencing results were available for all the 310 samples for INH and ETH specific targets,  
251 309 samples for FLQ specific targets, 306, 307 and 308 samples for AMK, CAP and KAN specific targets  
252 respectively. Compared to P-DST, the assay showed a sensitivity and specificity respectively of 98.3% and 95%  
253 for INH resistance, 91.4% and 98.5% for FLQ resistance, 91% and 99% for AMK resistance, 98.1% and 97%

254 for KAN resistance, 70% and 99.7% for CAP resistance and 65.4% and 97.3% for ETH resistance (Table 4).  
255 Compared to sequencing, the assay showed sensitivity of 99.7%, 97.5%, 100%, 96.5%, 94.1% and 88.5% for  
256 detection of INH, FLQ, AMK, KAN, CAP and ETH resistance respectively, with a specificity of 100% for all  
257 the drugs except for ETH with a specificity of 97.3% (Table 4). In this sample set, mutations present in the key  
258 target genes were as follows; g(-17)t, c(-15)t, t(-8)a and t(-8)c in *inhA* promoter region, S315T, S315N and  
259 S315G in the *katG* gene, L203L in the *fabG1* gene, G88C, D89N, A90V, D94A, D94G, D94Y in the *gyrA* gene,  
260 “a1401g” in the *rrs* gene and g(-37)t, c(-14)t, c(-12)t, g(-10)a and c(-8)a in the *eis* promoter region. All the *gyrB*  
261 and *ahpC* mutations present in this sample set were associated with mutations in the *gyrA* gene and *inhA*  
262 promoter or *katG* genes, respectively. The assay detected all the mutations present in the *inhA* promoter region  
263 and the *katG* gene, as well as all the low FLQ resistant A90V and D94A mutations and differentiated them from  
264 high FLQ resistance caused by other *gyrA* QRDR mutations. The assay also correctly detected SLID cross-  
265 resistance and individual resistance to KAN by correctly identifying the mutations in the *rrs* and *eis* promoter  
266 genes respectively. As shown in Figure 3, the assay was able to clearly and independently cluster the WT and  
267 mutant T<sub>m</sub> values for all the targets resulting in unequivocal identification of these mutations with a high  
268 degree of accuracy. A very few “Indeterminate” results were obtained for FLQ (0.3%), AMK (1.3%), KAN  
269 (0.6%) and CAP (0.9%) due to missing T<sub>m</sub> values from one or more of the key analytes related to detection of  
270 resistance to these drugs. We observed that in all these “Indeterminate” calls, the respective T<sub>m</sub> peaks were  
271 present, but they were not high enough to cross their pre-defined T<sub>m</sub> peak height threshold, and thus the T<sub>m</sub>  
272 values were not calculated by the assay algorithm, which indicates possible sub-LoD concentrations of the  
273 targets. In at least one case of CAP Indeterminate results, the missing T<sub>m</sub> from *rrs* probe could be attributed to  
274 unexpected optical aberrations in the instrument module, which prevented determination of the melt peak.

## 276 **Materials and Methods**

277 **Description of the assay.** The Xpert MTB/XDR assay is a 9-plex assay consisting of 10 sloppy  
278 molecular beacon (SMB) probes (32) that target 8 different *M. tuberculosis* genes detecting resistance to INH,  
279 ETH, FLQ and SLID. To detect INH resistance, four probes target the *inhA* promoter (nucleotides -1 to -32), the  
280 *katG* (codons 311-319) and *fabG1* (codons 199-210) genes, and the *oxyR-ahpC* (*ahpC*) intergenic region  
281 (nucleotides -5 to -50). Identification of *inhA* promoter mutations in a specific optical channel additionally  
282 enables detection of ETH resistance and allows differentiation of low-level INH resistance, as both resistance  
283 characteristics are encoded by mutations in the *inhA* promoter (33-35). To detect FLQ resistance, three  
284 overlapping probes target the *gyrA* QRDR (codons 87-95) and one probe targets the *gyrB* QRDR (codons 531-  
285 544). The three *gyrA* probes used in the assay have 8 defined mutant windows, which enables specific  
286 identification of the QRDR mutations A90V, S91P and D94A associated with low-level FLQ resistance and  
287 differentiates them from other QRDR mutations associated with higher-level FLQ resistance, as described in  
288 detail in the results section. To detect SLID resistance, namely AMK, KAN and CAP, one probe targets the *rrs*  
289 gene (nucleotides 1396-1417) and a second probe targets the *eis* promoter region (nucleotides -6 to -42). Cross-  
290 resistance between AMK, KAN and CAP is well documented (15-17) and is captured by *rrs* probe. The *eis*  
291 probe can differentiate between c(-14)t which confers cross-resistance to KAN and AMK and other mutations  
292 in the *eis* promoter region which only confer resistance to KAN, since the probe has been specifically designed  
293 to generate a higher T<sub>m</sub> shift for the c(-14)t mutation and a lower T<sub>m</sub> shift for all the other mutations from the  
294 WT T<sub>m</sub>. To serve as an internal sample processing and PCR control, an additional SPC probe targets a *Bacillus*  
295 *globigii* gene using the same fluorophore as the *ahpC* probe. This enabled us to accommodate the 11 probes in  
296 the assay within the 10 optical channels). Dehydrated *B. globigii* spore beads are included in the assay cartridge.  
297 The SPC probe is a Taqman probe, is only detectable during PCR amplification, and does not generate a  
298 melting curve and thus do not interfere with the melt signals from the *ahpC* SMB probe. Each of the 10 probes  
299 in the assay has one defined wild type (WT) T<sub>m</sub> range (defined as a WT T<sub>m</sub> window) and one or several T<sub>m</sub>

300 ranges that define the presence of mutants (mutant T<sub>m</sub> windows). WT or mutant sequences are identified by the  
301 WT and mutant T<sub>m</sub> values respectively for each target, which results in the “Resistance NOT DETECTED” or  
302 “Resistance DETECTED” calls respectively, for the related drugs. The PCR assay consists of two phases. The  
303 first phase is a conventional symmetric PCR, followed by a second nested asymmetric PCR phase, except for  
304 the SPC assay, which is symmetric in both phases. The nested asymmetric assay enables preferential  
305 amplification of the target strands to which the SMB probes bind with high efficiency even in this 9-plex assay  
306 system. Specific in-cartridge microfluidics allow the products of the first PCR to be added to the second PCR  
307 after 31 cycles are complete. The second PCR consists of 40 cycles followed by the melt curve stage. No third  
308 stage of linear PCR is used in this assay unlike the earlier XDR cartridge, which reduces the time to result from  
309 120 to under 90 minutes.

310 **Cartridge configuration, assay composition and testing procedure:** The Xpert MTB/XDR cartridge  
311 is a modified version of the prototype assay cartridge described previously (36). It consists of a multi-position  
312 fluidic valve, a bacterial capture chamber and 11 chambers containing buffers and reagents for sample  
313 processing and PCR, plus an integrated 50uL PCR tube. Two sets of two lyophilized beads each are used to  
314 amplify resistance-conferring regions of *inhA* promoter, *katG*, *fabG1*, *ahpC*, *gyrA*, *gyrB*, *rrs* and *eis* promoter as  
315 well as an internal control sequence of *B. globigii*. The first bead set is used to perform 9-plex PCR, followed  
316 by a full nested or hemi-nested PCR of the first set of amplicons using the second bead set. The second bead set  
317 contains SMBs for 10 gene targets and a Taqman probe for the internal control. The SMBs for the *ahpC* target  
318 and internal control share the same channel and are designed not to interfere with other’s detection.

319 To perform a test, each sample (spiked sputum, clinical sputum samples, cultured *M. tuberculosis* or *M.*  
320 *bovis* BCG CFU) was first mixed at a 2:1 ratio with an NaOH and isopropanol containing sample reagent (SR)  
321 as described previously(37); the sample was then added to the sample loading chamber of the cartridge (for CE-  
322 IVD use, sputum is the only recommended sample type currently for diagnostic purposes). The loaded cartridge  
323 was placed into a GeneXpert instrument running software developed for the Xpert MTB/XDR assay (Cepheid,

324 Sunnyvale, CA). The assay was then started and automated processing of the sample for DNA isolation  
325 followed by the two-phase PCR assay and melt analysis was performed. The microfluidics were similar to that  
326 previously described (36). Briefly, the internal control *B. globigii* spores were mixed with the sample, and the  
327 sample was then filtered through a bacterial capture filter within the cartridge. The captured bacteria and *B.*  
328 *globigii* spores were then washed multiple times with a wash buffer and DNA released from captured bacteria  
329 by highly efficient lysis through sonication. The lysate was then used to re-suspend the first set of PCR reagent  
330 beads. The PCR mix was aspirated into the PCR tube to initiate the first round of amplification. After this first  
331 PCR, a specific amount of the amplified sample was moved out of the tube and the PCR tube was then filled  
332 with a second set of PCR reagent beads that had been re-suspended in buffer and mixed with the remaining  
333 amplicon in the tube. A second PCR was then performed followed by a post PCR melt analysis, to generate  
334 first derivative T<sub>m</sub> curves. The T<sub>m</sub> values were identified by the automated GeneXpert T<sub>m</sub> calling software  
335 (Cepheid, Sunnyvale, CA) and classified as T<sub>m</sub> values that identified WT or mutant amplicon sequence based  
336 on pre-defined T<sub>m</sub> parameters (T<sub>m</sub> windows). These T<sub>m</sub> values were then used to determine the presence or  
337 absence of resistance to the target drugs.

338 **Preparation of *M. tuberculosis* and *M. bovis* BCG culture stocks and determination of CFU. *M.***  
339 *tuberculosis* culture stock preparation and CFU counts were determined as described previously (36). An  
340 attenuated strain of *M. tuberculosis* H37Rv (mc<sup>2</sup>6030) or *M. bovis* BCG was cultured by inoculating 1:100 in 20  
341 mL of Difco Middlebrook 7H9 media (BD Biosciences, California USA) supplemented with 10% BBL  
342 Middlebrook OADC Enrichment (BD Biosciences, California USA), 0.05% Tween 80 (Sigma Aldrich, St Louis,  
343 MO) and 24 µg/mL Calcium Pantothenate (Sigma Aldrich, St Louis, MO) for *M. tuberculosis* H37Rv (mc<sup>2</sup>6030).  
344 The strains were grown to the optical density 600nm of 0.6-0.8, sub-cultured twice before performing dilutions  
345 for CFU determinations and storage. The cultures were quantified by plating 10<sup>-5</sup>, 10<sup>-6</sup> and 10<sup>-7</sup> dilutions in  
346 triplicate on 7H10 plates supplemented with 10% OADC and 24 µg/mL Calcium Pantothenate for *M.*

347 *tuberculosis* H37Rv (mc<sup>2</sup>6030). The cultures were divided in 500 uL and stored at -80<sup>0</sup>C until use. Colony  
348 counts was performed 3 weeks after plating, once the colonies became visible.

349 **Dilutions and spiking in sputum for determining Limit of Detection:** To dilute and spike *M.*  
350 *tuberculosis* or *M. bovis* BCG in sputum for analytical studies, a frozen aliquot was processed as previously  
351 described (36). Briefly, the frozen aliquot was thawed at room temperature and re-suspended in 7H9 media up  
352 to 1 mL. The aliquot was then vortexed for 30 seconds and allowed to rest on ice for 6 minutes. The aliquot was  
353 then sonicated for 30 seconds using Branson CPX1800 Ultrasonic water-bath (Fisher Scientific, Waltham, MA,  
354 USA), followed by standing on ice for 30 seconds. This step was repeated twice more followed by resting for 6  
355 minutes on ice. The sonicated stock was then used to prepare the required dilutions in 4 mL 7H9 media up to  
356 1000 CFU/mL. Controlled mixing steps were performed during serial dilutions by aspirating and dispensing via  
357 pipette. The sonicated aliquot was stored at 4<sup>0</sup>C for no more than 7 days. If the sonicated aliquot was used on  
358 subsequent days, it was sonicated once for 30 seconds when re-used after 24 hrs. of first storage and 2 minutes  
359 of vortexing for any subsequent dilution experiments. The 1000 CFU/mL dilution was spiked in sputum to  
360 obtain the final test concentration. SR was added at 2:1 ratio to allow sufficient volume to distribute in 2 mL in  
361 each cartridge. To determine LoD, we tested 10, 20, 40, 60, 80, 100, 200 CFU/mL, 20 replicates each. For  
362 detection of LoD in concentrated sputum, unprocessed sputum samples were first spiked with the target level of  
363 *M. bovis* BCG CFU and each spiked sputum specimen was processed to obtain concentrated sediment using the  
364 BD BBL<sup>TM</sup> Mycoprep<sup>TM</sup> mycobacterial system digestion/decontamination kits (Becton Dickinson, Franklin  
365 Lakes, NJ, USA) following manufacturer's instructions. LoD was calculated by probit analysis performed on R  
366 studio.

367 **Detection of *gyrA* QRDR mutations.** We have created a repository of plasmids by cloning  
368 approximately 100 bp fragment of *gyrA* gene in vector p.MV306H with the help of gene synthesis and  
369 mutagenesis services of Genscript Biotech Inc. (Piscataway, NJ, USA). The cloned fragments contained the  
370 individual *gyrA* QRDR single point mutations that are frequently associated with FLQ resistance (18-20) in



371 each plasmid. Lyophilized recombinant plasmids were re-suspended in water and quantified by NanoDrop-1000.  
372 To determine T<sub>m</sub> of *gyrA* probes, each plasmid was tested multiple times at 100 pg/rxn. Mean T<sub>m</sub> and standard  
373 deviations were calculated using Microsoft Excel 365.

374 **Preparation of mixed cells to test for detection of heteroresistance.** Quantified preparations of  
375 hardened *E. coli* cells (Maine Molecular Quality Controls Inc., Saco, Maine, USA) that had been transfected  
376 with plasmids containing WT or mutant target sequences including c(-15)t in the *inhA* promoter, S513T in the  
377 *katG* gene, L203L in *fabG1*, c(-39)t in *oxyR-ahpC* region, D94G in the *gyrA*, E540D in *gyrB*, a1401g in *rrs*, and  
378 c(-14)t in the *eis* promoter were used. A series of cell mixtures containing 0%, 10%, 15%, 20%, 25%, 50%,  
379 60%, 75%, 90% and 100% of mutant was tested against a background of cells with WT sequences. The total  
380 amount of cells tested in each mixture was 10,000 cells/mL containing enough volume to test three replicates.  
381 Similarly, mixtures of low level FLQ resistance conferring mutations A90V, D94A and S91P in *gyrA* gene were  
382 prepared by mixing a series of cells containing 0%, 10%, 20%, 30%, 40%, 50% and 100% of mutant cells with  
383 cells with WT *gyrA* gene sequence at final cell counts 5000 cells/mL, replicates of three. SR reagent was added  
384 to each mixture at a 2:1 ratio and incubated for 15 minutes. 2 mL of the inactivated mixture was added to the  
385 cartridge. The cartridge placed into the GeneXpert instrument module and the assay performed by selecting a  
386 version of an automated assay protocol. Mean T<sub>m</sub>s were calculated and standard deviations were calculated in  
387 Microsoft Excel.

388 **Mutant panel challenge:** DNA was extracted from a panel of 14 clinical isolates with canonical  
389 mutations in the target genes and promoter regions known to be associated with clinical INH, FLQ, ETH and  
390 SLID resistance, by a boiling preparation using InstaGene Matrix (Bio-rad, Hercules, CA USA) or using Phenol  
391 Chloroform method, each described previously (32, 38). All the mutations were confirmed by Sanger  
392 sequencing of each of the target genes and promoter regions. All isolates were quantified using the Qubit  
393 dsDNA HS Assay kit (ThermoFisher Scientific, Waltham, MA USA). All isolates were tested at a concentration  
394 that was approximately 3X of a predetermined BCG DNA LoD (in terms of genome equivalents), or higher

395 when we observed indeterminate resistance calls resulting from absence of Tms due to poor quality of isolated  
396 DNA. The diluent solution (Tris EDTA Tween buffer) was used as Negative control, and BCG DNA at 3x the  
397 LoD was used as a positive control. Each isolate was tested in replicates of three. Mean Tms and standard  
398 deviations were calculated in Microsoft Excel. The isolates were pre-loaded in the XDR cartridge and the  
399 cartridge placed into the GeneXpert instrument module and the assay performed by selecting a version of an  
400 automated assay protocol that was slightly modified to permit testing of DNA rather than *M. tuberculosis* CFU.

401 **Analytical specificity and cross reactivity.** Thirty species of Non-tuberculosis Mycobacterium (NTM),  
402 either purchased from the American Type Culture Collection (ATCC) or kindly provided by the National  
403 Jewish Health (Denver, CO, USA), were cultured and quantified similar as described for *M. tuberculosis* in 7H9  
404 media supplemented with 10% Middlebrook OADC Growth supplement, and 0.05% Tween 80. We were able  
405 to cultivate and quantify all 30 NTM species except for *M. genevansae*, for which we could only record the  
406 optical density. Gram-negative and Gram-positive bacteria obtained from the University Hospital Microbiology  
407 Lab (University Hospital, Newark NJ, USA) were cultivated on blood agar plates. DNA was isolated by boiling  
408 preparation using an Instagene Matrix (32). The isolated DNA was measured by the Qubit dsDNA HS Assay  
409 Kit. Both NTM and Gram-negative and Gram-positive bacteria were tested at final concentration equivalent to  
410  $10^6$  to  $10^7$  CFU/mL. Dilution buffer was used as the negative control and BCG (cells and DNA) at 3x LoD was  
411 used as the positive control.

412 Twelve clinically relevant NTMs were identified to test in a mixture with *M. bovis BCG* to identify  
413 possible interference for *M. tuberculosis* detection by high concentrations of NTMs. The NTMs were diluted to  
414 a final test concentration  $10^6$  CFU/mL and mixed with *M. bovis BCG* at a final test 3x LoD of the stock with  
415 enough volume for four replicates. Dilution buffer was used as the negative control and *M. bovis BCG*, at 3x  
416 LoD concentration, was used as the positive control. To all test samples, SR reagent was added and incubated  
417 for 15 mins. 2mL sample was aliquoted to each cartridge and loaded into the GeneXpert instrument.

418 **Clinical study protocol.** A small clinical study was performed with well-characterized and archived  
419 frozen sputum and culture isolates from de-identified XDR TB patients provided by the Foundation of  
420 Innovative New Diagnostics (FIND) (39). The samples were obtained from Georgia, Moldova, Peru and  
421 Vietnam representing three different continents and were chosen to represent all the common clinically relevant  
422 mutations present in the target genes considering the global estimate of prevalence. The study was performed at  
423 two different sites at New Jersey Medical School, Rutgers University, Newark, NJ, USA and San Raffaele  
424 Hospital, Milan, Italy. The study consisted of 214 clinical isolates and 100 sputum samples from XDR TB  
425 patients, which were equally distributed between both the sites (107 clinical isolates and 50 sputum at each site).  
426 P-DST results were available for INH, ETH, at least one or more of the FLQs (Ofloxacin, Levofloxacin and  
427 Moxifloxacin) and the SLIDs (AMK, CAP and KAN). Sanger sequencing results were available for *katG*, *inhA*  
428 promoter, *fabG1*, *oxyR-ahpC* intergenic region, *gyrA*, *gyrB*, *rrs* and *eis* promoter i.e. all the target genes in the  
429 assay along with several other non-target genes associated with resistance to other first line drugs (including  
430 *pncA*, *ethA*, *ethA* upstream, *rpsL*, *tlyA*, *ndh* etc.). Each sputum sample consisted of 0.5 mL duplicate aliquots,  
431 which were thawed at room temperature and pooled, and vortexed thoroughly to ensure homogenization at each  
432 site before processing. The pooled 1 mL sputum was transferred to a new tube and 2 volumes of sample reagent  
433 (SR) was added to it, mixed and incubated for 15 minutes before performing the test. The frozen clinical  
434 isolates contained approximately 400-500 $\mu$ l of cell suspension at approximately  $10^6$  CFU/mL concentration.  
435 The isolates were thawed and sterile Tris pH 8.0 or PBS was added until the total volume of cell suspension was  
436 equivalent to 1 ml, vortexed well for 30 second and followed by standing for 5 minutes. Two volumes of  
437 Sample Reagent (SR) to the 1.0mL suspension, mixed and incubated for 15 minutes before performing the test.  
438 All the operators at each site as well as personnel performing the result interpretation and data analysis were  
439 completely blinded to the sequencing and the P-DST results. The aim of this study was to determine the  
440 diagnostic performance (sensitivity and specificity) of the Xpert MTB/XDR assay for INH, ETH, FLQ and  
441 SLID resistance detection compared to the individual reference standards P-DST (phenotypic reference standard)  
442 and sequencing (molecular reference standard). Analysis was performed by combining both the clinical isolates

443 and sputum for a composite analysis for both the sample types. Additionally, “Indeterminate” rates for each  
444 drug type and “Non determinate” run (run aborts due to errors) rates of the assay for each sample type at each  
445 site were also calculated. The “Non determinate” samples were repeated only for the isolates, since a second  
446 aliquot was available. No repeat runs were performed for “Non determinate” sputum since the entire sample  
447 was used for the first run.

448         Statistical Analysis: LoD was calculated using the percentages of the replicates resulting in successful  
449 TB detection and drug susceptibility calls at each input CFU concentration in sputum for both Xpert MTB/XDR  
450 and Xpert MTB/RIF assays using probit analysis on R studio version 1.2.5019, “Elderflower” (RStudio Team  
451 (2020). RStudio: Integrated Development for R. RStudio, PBC, Boston, MA URL <http://www.rstudio.com/>).  
452 Binary probit regression results were fitted through the tested concentrations, and lower and upper 95%  
453 confidence intervals (95% CIs) were generated for the curve. The 95% CI for the minimum input concentration  
454 was determined by where the 95% probability level crossed the upper and lower 95% CIs, which indicated the  
455 LoD. Mean T<sub>m</sub> and standard deviations were calculated on Microsoft Excel.

## 457 **Discussion**

458 We describe here the development of an *in vitro* diagnostic version of the prototype cartridge for INH,  
459 FLQ and SLID resistance detection (10) with better coverage for INH resistance, the capacity to detect low  
460 versus high level resistance for INH and FLQ, to identify individual versus cross-resistance to SLID, as well as  
461 with better analytical sensitivity and a reduced time to result. The SMB probe design and chemistry of the new  
462 Xpert MTB/XDR assay is similar to the prototype cartridge, with additional probes added to detect new targets  
463 indicative of INH and ETH resistance, an additional probe and modified probe designs for the *gyrA* gene to  
464 differentiate and identify low vs high-level FLQ resistance, and a modified *eis* probe design to identify KAN  
465 resistance only, versus KAN/AMK cross resistance. An additional *gyrB* probe in the prototype version, which  
466 targeted the codon 500, was removed from this assay to accommodate the new probes on account of very low  
467 frequency of any high confidence mutations present in the codon 500 of *gyrB* (24). This modified assay version  
468 eliminates the three-stage PCR amplification used in the prototype cartridge and closely approximates the PCR  
469 cycling strategy used in the Xpert MTB/RIF Ultra assay, where the first stage of symmetric PCR is followed by  
470 a second stage of asymmetric PCR preferentially amplifying the target strands, followed by a melt stage. We  
471 have also utilized the strategy of including a Taqman probe (SPC) and an SMB probe (*ahpC*) with the same  
472 fluorophore to emit signal in a single channel, which allowed us to develop a 10 color, 11-probe assay. The  
473 *ahpC* probe was designed to have a probe-target hybrid  $T_m$  close to the annealing temperature of the assay,  
474 while the Taqman probe was designed to have a probe-target hybrid  $T_m$  at least 5<sup>0</sup>C above the annealing  
475 temperature. This allowed us to generate good real time signals preferentially from the SPC Taqman probe  
476 during the amplification stage and obtain clear melt curves from the *ahpC* SMB probe during the melt stage,  
477 without any interference to melt signal from the Taqman probe.

478 Designing probes to distinguish high and low-level FLQ resistance was especially challenging, since we  
479 had to ensure that the Ser/Thr polymorphism at codon 95 was not recognized as a mutation, while all of the  
480 three low-level FLQ resistance-inducing mutations were individually identified and differentiated from all of

481 the other QRDR mutations. Several iterative probe designs were tested based on the probes present in our  
482 prototype cartridge and a combination of three overlapping probes were chosen to generate a series of T<sub>m</sub>  
483 signatures, which not only individually identified the three different mutations and differentiated them from  
484 other QRDR mutations, but also generated the same WT T<sub>m</sub> values for the codon 95 polymorphism. We  
485 successfully used this T<sub>m</sub> signature principle to identify these mutations by placing the mutant T<sub>m</sub> values in  
486 carefully chosen, specific WT and mutant T<sub>m</sub> windows for each probe, which underscores the previously  
487 described capacity for SMB probe tiling to accurately identify DNA sequences (40). The Xpert MTB/XDR  
488 assay targeted at least two regions in the *M. tuberculosis* genome which contained mutations spread over  
489 relatively long stretches, which would be very difficult for a single probe to query. These regions were the  
490 *oxyR-ahpC* intergenic region where mutations were spread over 46 bp and the *eis* promoter region where  
491 mutations were spread over 37 bp. We used poly dT and poly dA to link two different probes for the *ahpC*  
492 target region to generate a 49 bp long probe, and we used special proprietary Cepheid linkers to combine  
493 together two of the *eis* probes from the prototype cartridge assay to create a 50 bp long probe (including the  
494 linker sequence). We introduced mismatches in the probes to enhance the delta T<sub>m</sub> between the WT and mutant  
495 sequences, to ensure that clearly separated T<sub>m</sub> values were generated between mutant and WT sequences.  
496 These and other probe design principles were used to ensure that there was a  $\geq 2^{\circ}\text{C}$  separation between WT and  
497 mutant T<sub>m</sub> values for most clinically relevant mutations.

498 As a reflex INH and second line resistance detection assay to the Xpert MTB/RIF and Xpert MTB/RIF  
499 Ultra assays, our preference was to design Xpert MTB/XDR so that it had an analytical sensitivity at least  
500 matching that of the Xpert MTB/RIF assay, keeping in mind that the analytical sensitivity of Xpert MTB/RIF  
501 assay is roughly equivalent to the analytic sensitivity of the *rpoB* component of the Xpert MTB/RIF Ultra assay  
502 (36). The prototype cartridge LoD was 300 CFU/mL, which was in the range of, but not as good as, the Xpert  
503 MTB/RIF assay (130 CFU/mL). Our new Xpert MTB/XDR assay showed a comparable LoD to Xpert  
504 MTB/RIF for *M. tuberculosis* detection. We confirmed the reliability of our LoD estimation with multiple

505 cartridge lots and analytical studies performed at two laboratories. We did not perform any head-to-head  
506 comparisons between Xpert MTB/XDR and Xpert MTB/RIF Ultra since we expect that Xpert MTB/XDR will  
507 perform well with samples that test positive by Xpert MTB/RIF Ultra as long as the Xpert MTB/RIF Ultra does  
508 not produce a “Trace” call with “Indeterminate” rifampin resistance results due to low bacillary load.

509 We performed a limited clinical study on a panel of frozen sputum and clinical isolates from three  
510 different continents representing a wide range of clinically relevant mutations. The clinical isolates and sputum  
511 samples represent a considerable geographical variation, and thus enabled us to assess the performance of the  
512 assay as a reflex test on both TB positive sputum samples as well as *M. tuberculosis* clinical isolates. The  
513 performance of the assay when compared to P-DST generated very high sensitivity and specificity values  
514 except for ETH, which showed a sensitivity of 65.4%. The assay showed 100% specificity and 94-100%  
515 sensitivity in detecting WT and mutant sequence types for all other drug targets. The low sensitivity for ETH  
516 when compared to either reference standards can be explained by the fact that this assay targets only mutations  
517 in the *inhA* promoter, among the several other possible gene mutations, which may be associated with ETH  
518 resistance (16). In our study sample group, there were several ETH resistance-associated mutations in the *ethA*  
519 and the *ethA* upstream region, which are not targeted by our assay, which accounted for the low sensitivity of  
520 the assay in detecting ETH resistance. Detection of ETH resistance was not an original aim of the assay and was  
521 included later, since ETH resistance has been reported to show significant association with mutations in *inhA*  
522 promoter that are also associated with low level INH resistance as tested by our assay(35) (41). We can expect  
523 that that the assay will show similar performance when tested in a larger multi-centric clinical study.

524 The Xpert MTB/XDR assay is intended to be used as a reflex test for a specimen that is determined to be  
525 *M. tuberculosis* positive and to serve as an aid in the diagnosis the main types of resistance that exist in M/XDR  
526 TB when used in conjunction with clinical and other laboratory findings. To address the global MDR-TB crisis  
527 and expedite diagnosis, WHO has determined that expanding rapid testing and the detection of drug-resistant  
528 TB is a top priority (42) and recently endorsed a 6-9 month shorter treatment regimen, replacing conventional

18-24 month regimens (43). Access to fast, sensitive, and safer genotypic assays like Xpert MTB/RIF Ultra and Xpert MTB/XDR, which detect resistance by identifying mutations known to confer resistance to the first- and second-line drugs in a majority of clinical strains, will minimize the biohazard and reduce sample preparation to a few manual steps that are more amenable to use at the point of care. When used as a reflex assay in conjunction with Xpert MTB/RIF or Xpert MTB/RIF Ultra, the Xpert MTB/XDR assay can expand TB and drug resistance detection to medically underserved populations.

### **Acknowledgements:**

**Funding:** Research reported in this publication was supported by the National Institute of Allergy and Infectious Diseases of the National Institutes of Health under Award Number R01AI111397 and a grant from the Foundation for Innovative New Diagnostics. Research support was also provided by Cepheid. Cepheid collaborated in assay design, analytical study design and performance, while FIND was involved in the clinical study planning, design, and providing samples. The NIH had no role in study design, planning, or manuscript preparation. The content of this article is solely the responsibility of the authors and does not necessarily represent the official views of the National Institutes of Health.

### **Conflicts of interest**

D.A. receives income from license payments from Cepheid to Rutgers University. D.A. also reports receiving research contracts and support from Cepheid. D.A. and S.C. report the filing of patents for primers and probes for detecting drug resistance in *M. tuberculosis*. R.L.G., D.L., S.R., N.V., R.K., D.P. and S.C. are employed by Cepheid.



## 551 References

- 552 1. Organisation WH. 2018. Global Tuberculosis Report. <https://www.who.int/tb/publications/2018/en/>
- 553 2. Dookie N, Rambaran S, Padayatchi N, Mahomed S, Naidoo K. 2018. Evolution of drug resistance in
- 554 Mycobacterium tuberculosis: a review on the molecular determinants of resistance and implications for
- 555 personalized care. *J Antimicrob Chemother* 73:1138-1151.
- 556 3. Georghiou SB, Schumacher SG, Rodwell TC, Colman RE, Miotto P, Gilpin C, Ismail N, Rodrigues C, Warren R,
- 557 Weyer K, Zignol M, Arafah S, Cirillo DM, Denkinge CM. 2019. Guidance for Studies Evaluating the Accuracy of
- 558 Rapid Tuberculosis Drug-Susceptibility Tests. *J Infect Dis* 220:S126-S135.
- 559 4. Boehme CC, Nabeta P, Hillemann D, Nicol MP, Shenai S, Krapp F, Allen J, Tahirli R, Blakemore R, Rustomjee R,
- 560 Milovic A, Jones M, O'Brien SM, Persing DH, Ruesch-Gerdes S, Gotuzzo E, Rodrigues C, Alland D, Perkins MD.
- 561 2010. Rapid molecular detection of tuberculosis and rifampin resistance. *N Engl J Med* 363:1005-15.
- 562 5. Dorman SE, Schumacher SG, Alland D, Nabeta P, Armstrong DT, King B, Hall SL, Chakravorty S, Cirillo DM,
- 563 Tukvadze N, Bablishvili N, Stevens W, Scott L, Rodrigues C, Kazi MI, Joloba M, Nakiyingi L, Nicol MP,
- 564 Ghebrekristos Y, Anyango I, Murithi W, Dietze R, Lyrio Peres R, Skrahina A, Auchynka V, Chopra KK, Hanif M, Liu
- 565 X, Yuan X, Boehme CC, Ellner JJ, Denkinge CM, study t. 2018. Xpert MTB/RIF Ultra for detection of
- 566 Mycobacterium tuberculosis and rifampicin resistance: a prospective multicentre diagnostic accuracy study.
- 567 *Lancet Infect Dis* 18:76-84.
- 568 6. Marks GB, Nguyen NV, Nguyen PTB, Nguyen T-A, Nguyen HB, Tran KH, Nguyen SV, Luu KB, Tran DTT, Vo QTN, Le
- 569 OTT, Nguyen YH, Do VQ, Mason PH, Nguyen V-AT, Ho J, Sintchenko V, Nguyen LN, Britton WJ, Fox GJ. 2019.
- 570 Community-wide Screening for Tuberculosis in a High-Prevalence Setting. *New England Journal of Medicine*
- 571 381:1347-1357.
- 572 7. Sachdeva KS, Raizada N, Sreenivas A, Van't Hoog AH, van den Hof S, Dewan PK, Thakur R, Gupta RS, Kulsange S,
- 573 Vadera B, Babre A, Gray C, Parmar M, Ghedia M, Ramachandran R, Alavadi U, Arinaminpathy N, Denkinge C,
- 574 Boehme C, Paramasivan CN. 2015. Use of Xpert MTB/RIF in Decentralized Public Health Settings and Its Effect on
- 575 Pulmonary TB and DR-TB Case Finding in India. *PLoS One* 10:e0126065.
- 576 8. Heyckendorf J, Andres S, Koser CU, Olaru ID, Schon T, Sturegard E, Beckert P, Schleusener V, Kohl TA, Hillemann
- 577 D, Moradigaravand D, Parkhill J, Peacock SJ, Niemann S, Lange C, Merker M. 2018. What Is Resistance? Impact of
- 578 Phenotypic versus Molecular Drug Resistance Testing on Therapy for Multi- and Extensively Drug-Resistant
- 579 Tuberculosis. *Antimicrob Agents Chemother* 62.
- 580 9. Eddabra R, Ait Benhassou H. 2018. Rapid molecular assays for detection of tuberculosis. *Pneumonia (Nathan)*
- 581 10:4.
- 582 10. Chakravorty S, Roh SS, Glass J, Smith LE, Simmons AM, Lund K, Lokhov S, Liu X, Xu P, Zhang G, Via LE, Shen Q,
- 583 Ruan X, Yuan X, Zhu HZ, Viazovkina E, Shenai S, Rowneki M, Lee JS, Barry CE, 3rd, Gao Q, Persing D, Kwiatkawoski
- 584 R, Jones M, Gall A, Alland D. 2017. Detection of Isoniazid-, Fluoroquinolone-, Amikacin-, and Kanamycin-
- 585 Resistant Tuberculosis in an Automated, Multiplexed 10-Color Assay Suitable for Point-of-Care Use. *J Clin*
- 586 *Microbiol* 55:183-198.
- 587 11. Xie YL, Chakravorty S, Armstrong DT, Hall SL, Via LE, Song T, Yuan X, Mo X, Zhu H, Xu P, Gao Q, Lee M, Lee J,
- 588 Smith LE, Chen RY, Joh JS, Cho Y, Liu X, Ruan X, Liang L, Dharan N, Cho SN, Barry CE, 3rd, Ellner JJ, Dorman SE,
- 589 Alland D. 2017. Evaluation of a Rapid Molecular Drug-Susceptibility Test for Tuberculosis. *N Engl J Med*
- 590 377:1043-1054.
- 591 12. Ando H, Miyoshi-Akiyama T, Watanabe S, Kirikae T. 2014. A silent mutation in mabA confers isoniazid resistance
- 592 on Mycobacterium tuberculosis. *Mol Microbiol* 91:538-47.
- 593 13. Kelley CL, Rouse DA, Morris SL. 1997. Analysis of ahpC gene mutations in isoniazid-resistant clinical isolates of
- 594 Mycobacterium tuberculosis. *Antimicrob Agents Chemother* 41:2057-8.
- 595 14. Zaunbrecher MA, Sikes RD, Jr., Metchock B, Shinnick TM, Posey JE. 2009. Overexpression of the chromosomally
- 596 encoded aminoglycoside acetyltransferase eis confers kanamycin resistance in Mycobacterium tuberculosis.
- 597 *Proc Natl Acad Sci U S A* 106:20004-9.

- 598 15. Georghiou SB, Magana M, Garfein RS, Catanzaro DG, Catanzaro A, Rodwell TC. 2012. Evaluation of genetic  
599 mutations associated with *Mycobacterium tuberculosis* resistance to amikacin, kanamycin and capreomycin: a  
600 systematic review. *PLoS One* 7:e33275.
- 601 16. Miotto P, Tessema B, Tagliani E, Chindelevitch L, Starks AM, Emerson C, Hanna D, Kim PS, Liwski R, Zignol M,  
602 Gilpin C, Niemann S, Denkinger CM, Fleming J, Warren RM, Crook D, Posey J, Gagneux S, Hoffner S, Rodrigues C,  
603 Comas I, Engelthaler DM, Murray M, Alland D, Rigouts L, Lange C, Dheda K, Hasan R, Ranganathan UDK,  
604 McNerney R, Ezewudo M, Cirillo DM, Schito M, Koser CU, Rodwell TC. 2017. A standardised method for  
605 interpreting the association between mutations and phenotypic drug resistance in *Mycobacterium tuberculosis*.  
606 *Eur Respir J* 50.
- 607 17. Campbell PJ, Morlock GP, Sikes RD, Dalton TL, Metchock B, Starks AM, Hooks DP, Cowan LS, Plikaytis BB, Posey  
608 JE. 2011. Molecular detection of mutations associated with first- and second-line drug resistance compared with  
609 conventional drug susceptibility testing of *Mycobacterium tuberculosis*. *Antimicrob Agents Chemother* 55:2032-  
610 41.
- 611 18. Farhat MR, Jacobson KR, Franke MF, Kaur D, Sloutsky A, Mitnick CD, Murray M. 2016. Gyrase Mutations Are  
612 Associated with Variable Levels of Fluoroquinolone Resistance in *Mycobacterium tuberculosis*. *J Clin Microbiol*  
613 54:727-33.
- 614 19. Chien JY, Chiu WY, Chien ST, Chiang CJ, Yu CJ, Hsueh PR. 2016. Mutations in *gyrA* and *gyrB* among  
615 Fluoroquinolone- and Multidrug-Resistant *Mycobacterium tuberculosis* Isolates. *Antimicrob Agents Chemother*  
616 60:2090-6.
- 617 20. Von Groll A, Martin A, Jureen P, Hoffner S, Vandamme P, Portaels F, Palomino JC, da Silva PA. 2009.  
618 Fluoroquinolone resistance in *Mycobacterium tuberculosis* and mutations in *gyrA* and *gyrB*. *Antimicrob Agents*  
619 *Chemother* 53:4498-500.
- 620 21. Farhat MR, Jacobson KR, Franke MF, Kaur D, Murray M, Mitnick CD. 2017. Fluoroquinolone Resistance Mutation  
621 Detection Is Equivalent to Culture-Based Drug Sensitivity Testing for Predicting Multidrug-Resistant Tuberculosis  
622 Treatment Outcome: A Retrospective Cohort Study. *Clin Infect Dis* 65:1364-1370.
- 623 22. Rigouts L, Coeck N, Gumusboga M, de Rijk WB, Aung KJ, Hossain MA, Fissette K, Rieder HL, Meehan CJ, de Jong  
624 BC, Van Deun A. 2016. Specific *gyrA* gene mutations predict poor treatment outcome in MDR-TB. *J Antimicrob*  
625 *Chemother* 71:314-23.
- 626 23. Li J, Gao X, Luo T, Wu J, Sun G, Liu Q, Jiang Y, Zhang Y, Mei J, Gao Q. 2014. Association of *gyrA/B* mutations and  
627 resistance levels to fluoroquinolones in clinical isolates of *Mycobacterium tuberculosis*. *Emerg Microbes Infect*  
628 3:e19.
- 629 24. Avalos E, Catanzaro D, Catanzaro A, Ganiats T, Brodine S, Alcaraz J, Rodwell T. 2015. Frequency and geographic  
630 distribution of *gyrA* and *gyrB* mutations associated with fluoroquinolone resistance in clinical *Mycobacterium*  
631 *tuberculosis* isolates: a systematic review. *PLoS One* 10:e0120470.
- 632 25. Malik S, Willby M, Sikes D, Tsodikov OV, Posey JE. 2012. New insights into fluoroquinolone resistance in  
633 *Mycobacterium tuberculosis*: functional genetic analysis of *gyrA* and *gyrB* mutations. *PLoS One* 7:e39754.
- 634 26. Gagneux S. 2018. Ecology and evolution of *Mycobacterium tuberculosis*. *Nat Rev Microbiol* 16:202-213.
- 635 27. Supply P, Marceau M, Mangenot S, Roche D, Rouanet C, Khanna V, Majlessi L, Criscuolo A, Tap J, Pawlik A, Fiette  
636 L, Orgeur M, Fabre M, Parmentier C, Frigui W, Simeone R, Boritsch EC, Debie AS, Willery E, Walker D, Quail MA,  
637 Ma L, Bouchier C, Salvignol G, Sayes F, Cascioferro A, Seemann T, Barbe V, Loch C, Gutierrez MC, Leclerc C,  
638 Bentley SD, Stinear TP, Brisse S, Medigue C, Parkhill J, Cruveiller S, Brosch R. 2013. Genomic analysis of smooth  
639 tubercle bacilli provides insights into ancestry and pathoadaptation of *Mycobacterium tuberculosis*. *Nat Genet*  
640 45:172-9.
- 641 28. Zhang X, Zhao B, Liu L, Zhu Y, Zhao Y, Jin Q. 2012. Subpopulation analysis of heteroresistance to fluoroquinolone  
642 in *Mycobacterium tuberculosis* isolates from Beijing, China. *J Clin Microbiol* 50:1471-4.
- 643 29. Eilertson B, Maruri F, Blackman A, Herrera M, Samuels DC, Sterling TR. 2014. High proportion of  
644 heteroresistance in *gyrA* and *gyrB* in fluoroquinolone-resistant *Mycobacterium tuberculosis* clinical isolates.  
645 *Antimicrob Agents Chemother* 58:3270-5.

- 646 30. Operario DJ, Koeppl AF, Turner SD, Bao Y, Pholwat S, Banu S, Foongladda S, Mpagama S, Gratz J, Ogarkov O,  
647 Zhadova S, Heysell SK, Houpt ER. 2017. Prevalence and extent of heteroresistance by next generation  
648 sequencing of multidrug-resistant tuberculosis. *PLoS One* 12:e0176522.
- 649 31. Kargarpour Kamakoli M, Sadegh HR, Farmanfarmaei G, Masoumi M, Fateh A, Javadi G, Rahimi Jamnani F, Vaziri F,  
650 Siadat SD. 2017. Evaluation of the impact of polyclonal infection and heteroresistance on treatment of  
651 tuberculosis patients. *Sci Rep* 7:41410.
- 652 32. Chakravorty S, Aladegbami B, Thoms K, Lee JS, Lee EG, Rajan V, Cho EJ, Kim H, Kwak H, Kurepina N, Cho SN,  
653 Kreiswirth B, Via LE, Barry CE, 3rd, Alland D. 2011. Rapid detection of fluoroquinolone-resistant and  
654 heteroresistant *Mycobacterium tuberculosis* by use of sloppy molecular beacons and dual melting-temperature  
655 codes in a real-time PCR assay. *J Clin Microbiol* 49:932-40.
- 656 33. Morlock GP, Metchock B, Sikes D, Crawford JT, Cooksey RC. 2003. *ethA*, *inhA*, and *katG* loci of ethionamide-  
657 resistant clinical *Mycobacterium tuberculosis* isolates. *Antimicrob Agents Chemother* 47:3799-805.
- 658 34. Ghodousi A, Tagliani E, Karunaratne E, Niemann S, Perera J, Koser CU, Cirillo DM. 2019. Isoniazid Resistance in  
659 *Mycobacterium tuberculosis* Is a Heterogeneous Phenotype Composed of Overlapping MIC Distributions with  
660 Different Underlying Resistance Mechanisms. *Antimicrob Agents Chemother* 63.
- 661 35. Seifert M, Catanzaro D, Catanzaro A, Rodwell TC. 2015. Genetic mutations associated with isoniazid resistance in  
662 *Mycobacterium tuberculosis*: a systematic review. *PLoS One* 10:e0119628.
- 663 36. Chakravorty S, Simmons AM, Rowneki M, Parmar H, Cao Y, Ryan J, Banada PP, Deshpande S, Shenai S, Gall A,  
664 Glass J, Kreiswirth B, Schumacher SG, Nabeta P, Tukvadze N, Rodrigues C, Skrahina A, Tagliani E, Cirillo DM,  
665 Davidow A, Denkinger CM, Persing D, Kwiatkowski R, Jones M, Alland D. 2017. The New Xpert MTB/RIF Ultra:  
666 Improving Detection of *Mycobacterium tuberculosis* and Resistance to Rifampin in an Assay Suitable for Point-  
667 of-Care Testing. *mBio* 8.
- 668 37. Helb D, Jones M, Story E, Boehme C, Wallace E, Ho K, Kop J, Owens MR, Rodgers R, Banada P, Safi H, Blakemore  
669 R, Lan NT, Jones-Lopez EC, Levi M, Burday M, Ayakaka I, Mugerwa RD, McMillan B, Winn-Deen E, Christel L,  
670 Dailey P, Perkins MD, Persing DH, Alland D. 2010. Rapid detection of *Mycobacterium tuberculosis* and rifampin  
671 resistance by use of on-demand, near-patient technology. *J Clin Microbiol* 48:229-37.
- 672 38. van Soolingen D, Hermans PW, de Haas PE, Soll DR, van Embden JD. 1991. Occurrence and stability of insertion  
673 sequences in *Mycobacterium tuberculosis* complex strains: evaluation of an insertion sequence-dependent DNA  
674 polymorphism as a tool in the epidemiology of tuberculosis. *J Clin Microbiol* 29:2578-86.
- 675 39. Tessema B, Nabeta P, Valli E, Albertini A, Collantes J, Lan NH, Romancenco E, Tukvadze N, Denkinger CM,  
676 Dolinger DL. 2017. FIND Tuberculosis Strain Bank: a Resource for Researchers and Developers Working on Tests  
677 To Detect *Mycobacterium tuberculosis* and Related Drug Resistance. *J Clin Microbiol* 55:1066-1073.
- 678 40. Cao Y, Parmar H, Simmons AM, Kale D, Tong K, Lieu D, Persing D, Kwiatkowski R, Alland D, Chakravorty S. 2019.  
679 Automatic identification of individual *rpoB* gene mutations responsible for rifampin resistance in *Mycobacterium*  
680 *tuberculosis* using melting temperature signatures generated by the Xpert(R) MTB/RIF Ultra\* assay. *J Clin*  
681 *Microbiol* doi:10.1128/JCM.00907-19.
- 682 41. Hazbon MH, Brimacombe M, Bobadilla del Valle M, Cavatore M, Guerrero MI, Varma-Basil M, Billman-Jacobe H,  
683 Lavender C, Fyfe J, Garcia-Garcia L, Leon CI, Bose M, Chaves F, Murray M, Eisenach KD, Sifuentes-Osornio J, Cave  
684 MD, Ponce de Leon A, Alland D. 2006. Population genetics study of isoniazid resistance mutations and evolution  
685 of multidrug-resistant *Mycobacterium tuberculosis*. *Antimicrob Agents Chemother* 50:2640-9.
- 686 42. Organisation WH. 2017. Global Tuberculosis Report 2017. <https://www.who.int/tb/publications/2017/en/>
- 687 43. Organisation WH. 2016. WHO treatment guidelines for drug-resistant tuberculosis 2016 update.  
688 <https://www.who.int/tb/publications/2016/en/>

689

690

691 **Table 1.** Mean T<sub>m</sub> values ( $\pm$  SD)\*\* of the three *gyrA* probes with representative *gyrA* mutant plasmids and  
 692 their corresponding windows. WT windows are highlighted in green and the three mutant windows are in blue,  
 693 orange and yellow respectively.

| Genotype           |                         | Probe 1           | Probe 2           | Probe 3           | FLQ Result Output                  |
|--------------------|-------------------------|-------------------|-------------------|-------------------|------------------------------------|
| WT<br>(95S or T)   | Mean T <sub>m</sub>     | 76.2 ( $\pm$ 0.2) | 70 ( $\pm$ 0.2)   | 70.8 (+0.2)       | <b>FLQ Resistance NOT DETECTED</b> |
|                    | T <sub>m</sub> window   | WT                | WT                | WT                |                                    |
| G88C<br>(95S or T) | Mean T <sub>m</sub>     | 72.7 (+0.3)       | 65.2 ( $\pm$ 0.4) | 66.4 (+0.3)       | <b>FLQ Resistance DETECTED</b>     |
|                    | $\Delta$ T <sub>m</sub> | -3.4              | -4.8              | -4.4              |                                    |
|                    | T <sub>m</sub> window   | Mut B             | Mut B             | Mut C             |                                    |
| G88A<br>(95S or T) | Mean T <sub>m</sub>     | 71.7 (+0.5)       | 63.9 ( $\pm$ 0.3) | 65.4 (+0.3)       | <b>FLQ Resistance DETECTED</b>     |
|                    | $\Delta$ T <sub>m</sub> | -4.4              | -6.1              | -5.4              |                                    |
|                    | T <sub>m</sub> window   | Mut B             | Mut B             | Mut C             |                                    |
| A90V<br>(95S or T) | Mean T <sub>m</sub>     | 72.2 ( $\pm$ 0.2) | 75.6 (+0.3)       | 76.2 (+0.2)       | <b>Low FLQ Resistance DETECTED</b> |
|                    | $\Delta$ T <sub>m</sub> | -4.1              | 5.6               | 5.4               |                                    |
|                    | T <sub>m</sub> window   | Mut B             | Mut A             | Mut B             |                                    |
| S91P<br>(95S or T) | Mean T <sub>m</sub>     | 72.2 ( $\pm$ 0.1) | 74.8 ( $\pm$ 0.1) | 66.1 ( $\pm$ 0.4) | <b>Low FLQ Resistance DETECTED</b> |
|                    | $\Delta$ T <sub>m</sub> | -3.9              | 4.8               | -4.7              |                                    |
|                    | T <sub>m</sub> window   | Mut B             | Mut A             | Mut C             |                                    |
| D94A<br>(95S or T) | Mean T <sub>m</sub>     | 78.9 ( $\pm$ 0.2) | 73.4 ( $\pm$ 0.2) | 71.4 ( $\pm$ 0.1) | <b>Low FLQ Resistance DETECTED</b> |
|                    | $\Delta$ T <sub>m</sub> | 2.7               | 3.4               | 0.6               |                                    |
|                    | T <sub>m</sub> window   | Mut A             | Mut A             | WT                |                                    |
| D94G<br>(95S or T) | Mean T <sub>m</sub>     | 76 ( $\pm$ 0.2)   | 69.5 ( $\pm$ 0.3) | 75.8 ( $\pm$ 0.2) | <b>FLQ Resistance DETECTED</b>     |
|                    | $\Delta$ T <sub>m</sub> | -0.1              | -0.5              | 5                 |                                    |
|                    | T <sub>m</sub> window   | WT                | WT                | Mut B             |                                    |
| D94N<br>(95S or T) | Mean T <sub>m</sub>     | 72.9 ( $\pm$ 0.3) | 66.1 (+0.4)       | 68.9 (+0.3)       | <b>FLQ Resistance DETECTED</b>     |
|                    | $\Delta$ T <sub>m</sub> | -3.2              | -3.9              | -1.9              |                                    |
|                    | T <sub>m</sub> window   | Mut B             | Mut B             | WT                |                                    |
| D94Y<br>(95S or T) | Mean T <sub>m</sub>     | 72.5 (+0.3)       | 65.1 (+0.4)       | 68.6 (+0.3)       | <b>FLQ Resistance DETECTED</b>     |
|                    | $\Delta$ T <sub>m</sub> | -3.6              | -4.9              | -2.2              |                                    |
|                    | T <sub>m</sub> window   | Mut B             | Mut B             | Mut C             |                                    |
| D94H<br>(95S or T) | Mean T <sub>m</sub>     | 73.2 (+0.3)       | 65.6 (+0.3)       | 68.9 (+0.3)       | <b>FLQ Resistance DETECTED</b>     |
|                    | $\Delta$ T <sub>m</sub> | -2.9              | -4.4              | -1.9              |                                    |
|                    | T <sub>m</sub> window   | WT                | Mut B             | WT                |                                    |
| A90V+S91P          | Mean T <sub>m</sub>     | 67.5 (+0.3)       | 79.3 (+0.2)       | 71.7 (+0.1)       | <b>FLQ Resistance</b>              |

|                                 |              |                    |                 |                 |                                    |
|---------------------------------|--------------|--------------------|-----------------|-----------------|------------------------------------|
| <b>(95S or T)</b>               | $\Delta T_m$ | -8.6               | 9.3             | 0.9             | <b>DETECTED</b>                    |
|                                 | Tm window    | Mut C              | Mut A           | WT              |                                    |
| <b>A90V+G88C<br/>(95S or T)</b> | Mean Tm      | 67.8 ( $\pm 0.5$ ) | 71.3 ( $+0.2$ ) | 72.2 ( $+0.2$ ) | <b>FLQ Resistance<br/>DETECTED</b> |
|                                 | $\Delta T_m$ | -8.3               | 1.3             | 1.4             |                                    |
|                                 | Tm window    | Mut C              | WT              | WT              |                                    |

\*\*Mean Tm and SD were generated from 3 to 163 replicates from multiple experiments depending on genotype

694

695

696 **Table 2.** Xpert MTB/XDR mutant DNA panel challenge.

| Strain ID        | Gene conferring resistance | Resistance conferring variant** | Melting temperature ( $\pm$ SD) ( $^{\circ}$ C) |                      |                      |                   |                                                |                                   |                                    |                      |                    |                      |
|------------------|----------------------------|---------------------------------|-------------------------------------------------|----------------------|----------------------|-------------------|------------------------------------------------|-----------------------------------|------------------------------------|----------------------|--------------------|----------------------|
|                  |                            |                                 | inhA                                            | katG                 | fabG                 | ahpC              | gyrA1                                          | gyrA2                             | gyrA3                              | gyrB2                | rrs                | eis                  |
| H37Rv            | NA                         | None                            | 76.3<br>(+0.0)                                  | 73.7<br>(+0.0)       | 71.4<br>(+0.1)       | 69.3<br>(+0.0)    | 76.1<br>(+0.1)                                 | 70.3<br>(+0.1)                    | 71.1<br>(+0.1)                     | 69.6<br>(+0.0)       | 75<br>(+0.0)       | 68.5<br>(+0.1)       |
| Clinical isolate | katG                       | S315T                           | 76.5<br>( $\pm$ 0.0)                            | 68.4<br>( $\pm$ 0.0) | 71.6<br>( $\pm$ 0.0) | 0<br>( $\pm$ 0.0) | 76.5<br>(+0.0)                                 | 70.4<br>(+0.0)                    | 71.3<br>(+0.0)                     | 69.7<br>( $\pm$ 0.1) | 75.2<br>(+0.0)     | 68.6<br>(+0.0)       |
| Clinical isolate | gyrA                       | D94G                            | 76.5<br>( $\pm$ 0.1)                            | 68.4<br>( $\pm$ 0.1) | 71.5<br>(+0.0)       | 0.0               | 76.2<br>( $\pm$ 0.1)                           | 69.7<br>(+0.0)                    | 75.7<br>(+0.0)                     | 69.7<br>(+0.1)       | 71.0<br>(+0.0)     | 68.6<br>( $\pm$ 0.1) |
|                  | katG                       | S315T                           |                                                 |                      |                      |                   |                                                |                                   |                                    |                      |                    |                      |
|                  | rrs                        | a1410g                          |                                                 |                      |                      |                   |                                                |                                   |                                    |                      |                    |                      |
| Clinical isolate | gyrB                       | C539A                           | 71.1<br>(+0.0)                                  | 73.8<br>(+0.0)       | 71.6<br>(+0.0)       | 67.2<br>(+0.0)    | 72.3<br>(+0.0)                                 | 75.9<br>( $\pm$ 0.1)              | 76.5<br>(+0.0)                     | 68.6<br>(+0.0)       | 71.1<br>(+0.0)     | 68.6<br>(+0.0)       |
|                  | rrs                        | a1410g                          |                                                 |                      |                      |                   |                                                |                                   |                                    |                      |                    |                      |
|                  | gyrA                       | A90V                            |                                                 |                      |                      |                   |                                                |                                   |                                    |                      |                    |                      |
|                  | OxyR-ahpC                  | g -6 a                          |                                                 |                      |                      |                   |                                                |                                   |                                    |                      |                    |                      |
|                  | inhA promoter              | c -15 t                         |                                                 |                      |                      |                   |                                                |                                   |                                    |                      |                    |                      |
| Clinical isolate | gyrA                       | D94Y                            | 76.3<br>(+0.0)                                  | 68.2<br>(+0.0)       | 75.6<br>(+0.0)       | 0.0               | 72.7<br>(+0.0)                                 | 0.0                               | 69<br>(+0.0)                       | 69.6<br>(+0.0)       | 75<br>(+0.0)       | 68.5<br>(+0.0)       |
|                  | katG                       | S315T                           |                                                 |                      |                      |                   |                                                |                                   |                                    |                      |                    |                      |
|                  | fabG1                      | g609a                           |                                                 |                      |                      |                   |                                                |                                   |                                    |                      |                    |                      |
| Clinical isolate | gyrA                       | S91P                            | 71.1<br>(+0.0)                                  | 73.9<br>(+0.1)       | 71.7<br>( $\pm$ 0.1) | 0.0               | 72.2<br>(+0.0)                                 | 75.1<br>(+0.0)                    | 66.6<br>(+0.0)                     | 69.7<br>(+0.0)       | 75.2<br>(+0.0)     | 68.6<br>(+0.0)       |
|                  | inhA promoter              | c -15 t                         |                                                 |                      |                      |                   |                                                |                                   |                                    |                      |                    |                      |
| Clinical isolate | gyrA                       | A90 A/V,<br>D94 D/G             | 71.03<br>( $\pm$ 0.1)                           | 73.7<br>(+0.1)       | 71.6<br>(+0.0)       | 0.0               | 76.13<br>( $\pm$ 0.1)                          | 69.4<br>( $\pm$ 0.2)              | 76<br>( $\pm$ 0.10)                | 69.7<br>(+0.0)       | 75.1<br>(+0.0)     | 68.5<br>(+0.0)       |
|                  | inhA promoter              | c -15 t                         |                                                 |                      |                      |                   |                                                |                                   |                                    |                      |                    |                      |
|                  | OxyR-ahpC                  | g -6 a                          |                                                 |                      |                      |                   |                                                |                                   |                                    |                      |                    |                      |
| Clinical isolate | gyrA                       | G88G/A,<br>A90V,<br>S91S/P      | 76.43<br>( $\pm$ 0.1)                           | 68.3<br>( $\pm$ 0.1) | 71.5<br>( $\pm$ 0.1) | 69.3<br>(+0.0)    | 72.2<br>( $\pm$ 0.1) /<br>67.6<br>( $\pm$ 0.1) | 70.5<br>(+0.0)/<br>79.4<br>(+0.0) | 71.6<br>(+0.0) /<br>76.7<br>(+0.0) | 69.7<br>( $\pm$ 0.1) | 71<br>( $\pm$ 0.1) | 68.6<br>( $\pm$ 0.1) |
|                  | katG                       | S315T                           |                                                 |                      |                      |                   |                                                |                                   |                                    |                      |                    |                      |
|                  | rrs                        | a1410g                          |                                                 |                      |                      |                   |                                                |                                   |                                    |                      |                    |                      |

|                  |               |         |                |                |                |                 |                |                |                |                |                 |                |
|------------------|---------------|---------|----------------|----------------|----------------|-----------------|----------------|----------------|----------------|----------------|-----------------|----------------|
| Clinical isolate | katG          | S315T   | 76.4<br>(±0.1) | 68.3<br>(+0.0) | 71.5<br>(+0.0) | 67.1<br>(+0.0)  | 76.4<br>(+0.0) | 70.3<br>(+0.0) | 71.3<br>(+0.0) | 69.6<br>(+0.0) | 75.1<br>(+0.0)  | 68.6<br>(+0.0) |
|                  | OxyR-ahpC     | a -48 g |                |                |                |                 |                |                |                |                |                 |                |
| Clinical isolate | katG          | S315T   | 76.4<br>(±0.1) | 68.3<br>(±0.1) | 71.5<br>(±0.1) | 66.03<br>(±0.1) | 76.3<br>(+0.0) | 70.3<br>(+0.0) | 71.2<br>(+0.0) | 69.6<br>(±0.1) | 75.03<br>(±0.1) | 68.6<br>(±0.1) |
|                  | OxyR-ahpC     | a -48 g |                |                |                |                 |                |                |                |                |                 |                |
| Clinical isolate | gyrA          | D94A    | 70.9<br>(+0.0) | 68.2<br>(+0.0) | 71.5<br>(+0.0) | 69.1<br>(+0.0)  | 78.9<br>(+0.0) | 73.5<br>(+0.0) | 72.1<br>(+0.0) | 69.6<br>(+0.0) | 75<br>(+0.0)    | 62.6<br>(+0.0) |
|                  | katG          | S315T   |                |                |                |                 |                |                |                |                |                 |                |
|                  | inhA promoter | c -15 t |                |                |                |                 |                |                |                |                |                 |                |
| Clinical isolate | katG          | S315T   | 76.2<br>(+0.0) | 68.2<br>(+0.0) | 71.5<br>(+0.0) | 68.9<br>(±0.1)  | 76.2<br>(+0.0) | 70.3<br>(±0.1) | 71.2<br>(+0.0) | 69.5<br>(±0.1) | 74.9<br>(+0.0)  | 64.1<br>(+0.0) |
|                  | eis promoter  | g -10 a |                |                |                |                 |                |                |                |                |                 |                |
| Clinical isolate | katG          | S315T   | 76.4<br>(±0.1) | 68.3<br>(±0.1) | 71.6<br>(+0.0) | 69.2<br>(+0.1)  | 76.3<br>(±0.1) | 70.4<br>(+0.0) | 71.3<br>(+0.0) | 69.7<br>(+0.0) | 75.1<br>(±0.1)  | 64.2<br>(+0.0) |
|                  | eis promoter  | g -10 a |                |                |                |                 |                |                |                |                |                 |                |
| Clinical isolate | katG          | S315T   | 71.1<br>(+0.1) | 68.4<br>(+0.1) | 71.7<br>(+0.1) | 69.1<br>(+0.1)  | 76.5<br>(+0.1) | 70.3<br>(+0.1) | 71.4<br>(+0.0) | 69.7<br>(+0.1) | 75.2<br>(+0.1)  | 62.7<br>(+0.0) |
|                  | inhA promoter | c -15 t |                |                |                |                 |                |                |                |                |                 |                |
|                  | eis promoter  | c -12 t |                |                |                |                 |                |                |                |                |                 |                |
| Clinical isolate | katG          | S315T   | 70.9<br>(+0.0) | 68.2<br>(+0.0) | 71.5<br>(+0.0) | 69<br>(+0.0)    | 76.3<br>(+0.0) | 70.2<br>(±0.2) | 71.4<br>(+0.0) | 69.6<br>(+0.1) | 75<br>(+0.1)    | 62.6<br>(+0.0) |
|                  | inhA promoter | c -15 t |                |                |                |                 |                |                |                |                |                 |                |
|                  | eis promoter  | c -12 t |                |                |                |                 |                |                |                |                |                 |                |

\*\* Capital letters > amino acid change and small letters > nucleotide change

697

698

699

700 **Table 3.** Melting temperature values generated by the Xpert MTB/XDR assay tested for major *M. tuberculosis*  
 701 complex lineages and species.

| RFLP              | Lineage (S. gagneux) | Melt temperature ( $\pm$ SD) ( $^{\circ}$ C) |                      |                |                |                |                |                 |                |                |                |
|-------------------|----------------------|----------------------------------------------|----------------------|----------------|----------------|----------------|----------------|-----------------|----------------|----------------|----------------|
|                   |                      | inhA                                         | katG                 | fabG           | ahp C          | gyrA1          | gyrA2          | gyrA3           | gyrB2          | rrs            | eis            |
| AH1               | Lineage 4            | 76.3<br>( $\pm$ 0.2)                         | 73.7<br>( $\pm$ 0.1) | 71.5<br>(+0.1) | 69.1<br>(+0.2) | 76.3<br>(+0.1) | 70.3<br>(+0.1) | 71.2 (+0.1)     | 69.6<br>(+0.1) | 75 (+0.1)      | 68.5<br>(+0.1) |
| HR36              | Lineage 5            | 76.4<br>(+0.2)                               | 73.7<br>(+0.1)       | 71.5<br>(+0.1) | 69<br>(+0.1)   | 76.3<br>(+0.1) | 70.3<br>(+0.1) | 71.2 (+0.1)     | 69.6<br>(+0.2) | 75.0<br>(+0.1) | 68.6<br>(+0.1) |
| AR2               | Lineage 2            | 76.2<br>(+0.1)                               | 73.6<br>(+0.1)       | 71.4<br>(+0.1) | 68.8<br>(+0.1) | 76.3<br>(+0.0) | 70.3<br>(+0.1) | 71.2 (+0.0)     | 69.5<br>(+0.1) | 74.9<br>(+0.1) | 68.5<br>(+0.0) |
| GD139             | Lineage 3            | 76.3<br>(+0.2)                               | 73.7<br>(+0.1)       | 71.5<br>(+0.1) | 70.3<br>(+0.2) | 76.4<br>(+0.1) | 70.3<br>(+0.1) | 71.2 (+0.1)     | 69.6<br>(+0.2) | 75.0<br>(+0.2) | 68.6<br>(+0.1) |
| BCG               | Lineage 1            | 76.2                                         | 73.6<br>(+0.1)       | 71.5<br>(+0.0) | 68.6<br>(+0.0) | 76.3<br>(+0.0) | 70.3<br>(+0.1) | 71.15<br>(+0.1) | 69.5<br>(+0.0) | 74.9<br>(+0.0) | 68.5<br>(+0.0) |
| H37Rv             | Lineage 4            | 76.3<br>(+0.0)                               | 73.7<br>(+0.0)       | 71.4<br>(+0.1) | 69.3<br>(+0.0) | 76.1<br>(+0.1) | 70.3<br>(+0.1) | 71.1 (+0.1)     | 69.6<br>(+0.0) | 75 (+0.0)      | 68.5<br>(+0.1) |
| <i>M. bovis</i>   | Animal strain        | 76.4<br>(+0.0)                               | 73.8<br>(+0.0)       | 71.6<br>(+0.1) | 69.1<br>(+0.0) | 76.4<br>(+0.1) | 70.3<br>(+0.1) | 71.2 (+0.0)     | 69.6<br>(+0.1) | 75.0<br>(+0.1) | 68.6<br>(+0.1) |
| <i>M. canetti</i> | n/a                  | 76.4<br>(+0.1)                               | 73.8<br>(+0.0)       | 71.6<br>(+0.0) | 69.3<br>(+0.1) | 76.4<br>(+0.0) | 70.3<br>(+0.1) | 71.3 (+0.1)     | 67.8<br>(+0.0) | 75.1<br>(+0.1) | 68.6<br>(+0.0) |
| <i>M. microti</i> | Animal strain        | 76.4<br>(+0.1)                               | 73.8<br>(+0.0)       | 71.6<br>(+0.1) | 69.1<br>(+0.2) | 76.4<br>(+0.1) | 70.3<br>(+0.0) | 71.2 (+0.1)     | 69.6<br>(+0.1) | 75.1<br>(+0.1) | 68.6<br>(+0.0) |

702



703 **Table 4** Xpert MTB/XDR assay's concordance with P-DST and sequencing on drug resistance detection on

|              | <b>P-DST</b>      |           |           |           |           |                        |              |                        |              |
|--------------|-------------------|-----------|-----------|-----------|-----------|------------------------|--------------|------------------------|--------------|
| <b>Drugs</b> | <b>N</b>          | <b>TP</b> | <b>FN</b> | <b>TN</b> | <b>FP</b> | <b>Sensitivity (%)</b> | <b>95%CI</b> | <b>Specificity (%)</b> | <b>95%CI</b> |
| <b>INH</b>   | 309               | 284       | 5         | 19        | 1         | 98.3                   | 95.8-99.3    | 95.0                   | 73.1-99.7    |
| <b>FLQ</b>   | 305               | 32        | 3         | 266       | 4         | 91.4                   | 78.9-98.9    | 98.5                   | 95.9-99.5    |
| <b>AMK</b>   | 303               | 20        | 2         | 278       | 3         | 91.0                   | 69.4-98.4    | 98.9                   | 96.6-99.7    |
| <b>KAN</b>   | 306               | 101       | 2         | 197       | 6         | 98.1                   | 92.5-99.7    | 97.4                   | 93.4-98.8    |
| <b>CAP</b>   | 305               | 14        | 6         | 284       | 1         | 70.0                   | 45.6-87.2    | 99.7                   | 97.7-99.9    |
| <b>ETH</b>   | 265               | 102       | 54        | 106       | 3         | 65.4                   | 57.3-72.7    | 97.3                   | 91.6-99.3    |
|              | <b>Sequencing</b> |           |           |           |           |                        |              |                        |              |
| <b>Drugs</b> | <b>N</b>          | <b>TP</b> | <b>FN</b> | <b>TN</b> | <b>FP</b> | <b>Sensitivity (%)</b> | <b>95%CI</b> | <b>Specificity (%)</b> | <b>95%CI</b> |
| <b>INH</b>   | 310               | 286       | 1         | 23        | 0         | 99.6                   | 97.8-99.9    | 100                    | 82.2-100     |
| <b>FLQ</b>   | 309               | 39        | 1         | 269       | 0         | 97.5                   | 85.3-99.8    | 100                    | 98.2-100     |
| <b>AMK</b>   | 306               | 24        | 0         | 282       | 0         | 100                    | 82.8-100     | 100                    | 98.3-100     |
| <b>KAN</b>   | 308               | 109       | 4         | 195       | 0         | 96.4                   | 90.6-98.9    | 100                    | 97.6-100     |
| <b>CAP</b>   | 307               | 16        | 1         | 290       | 0         | 94.1                   | 69.2-99.6    | 100                    | 98.4-100     |
| <b>ETH</b>   | 310               | 108       | 14        | 183       | 5         | 88.5                   | 81.2-93.4    | 97.3                   | 93.6-99.0    |

704 clinical isolates and sputum samples

705 N= Number of samples; TP: True Positive; FN: False Negative; TN: True Negative; FP: False Positive

706

707

708

709

710



712

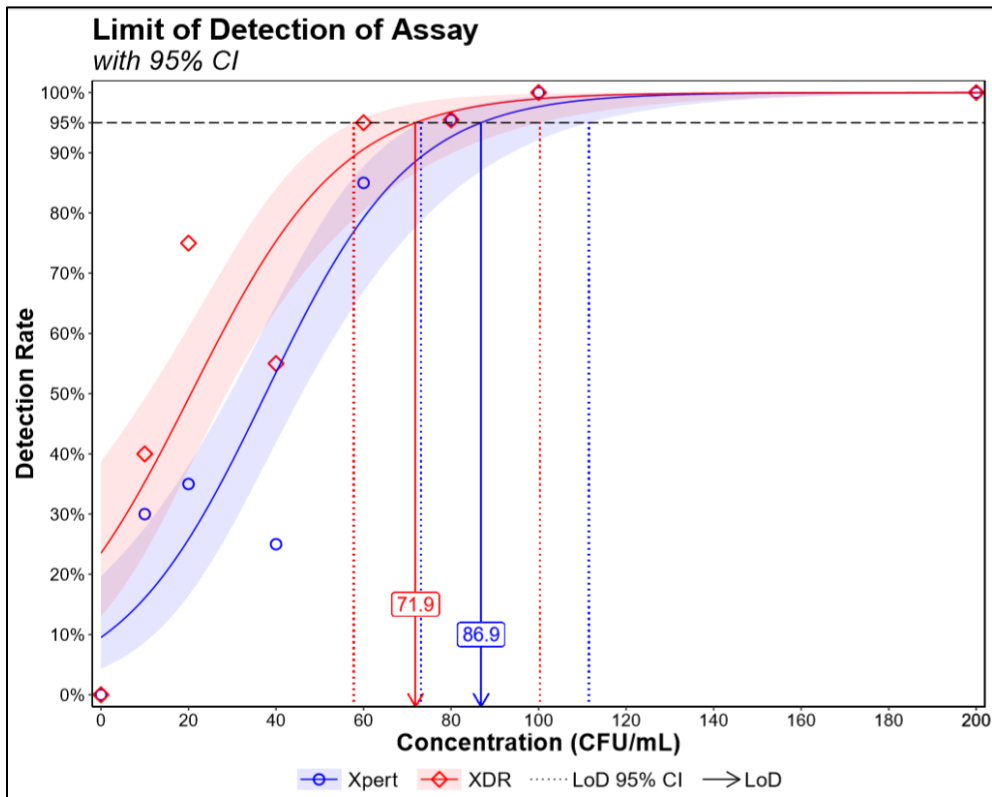

713

714

**Figure 1:** Limit of Detection of the Xpert MTB/XDR assay and the Xpert MTB/RIF assay performed side-by-

715

side, with a minimum of 20 replicates for each cell concentration. Both assays were tested at 10, 20, 40, 60, 80,

716

100 and 200 CFU/mL and probit analysis was performed to calculate the LoD using R studio.

717

718

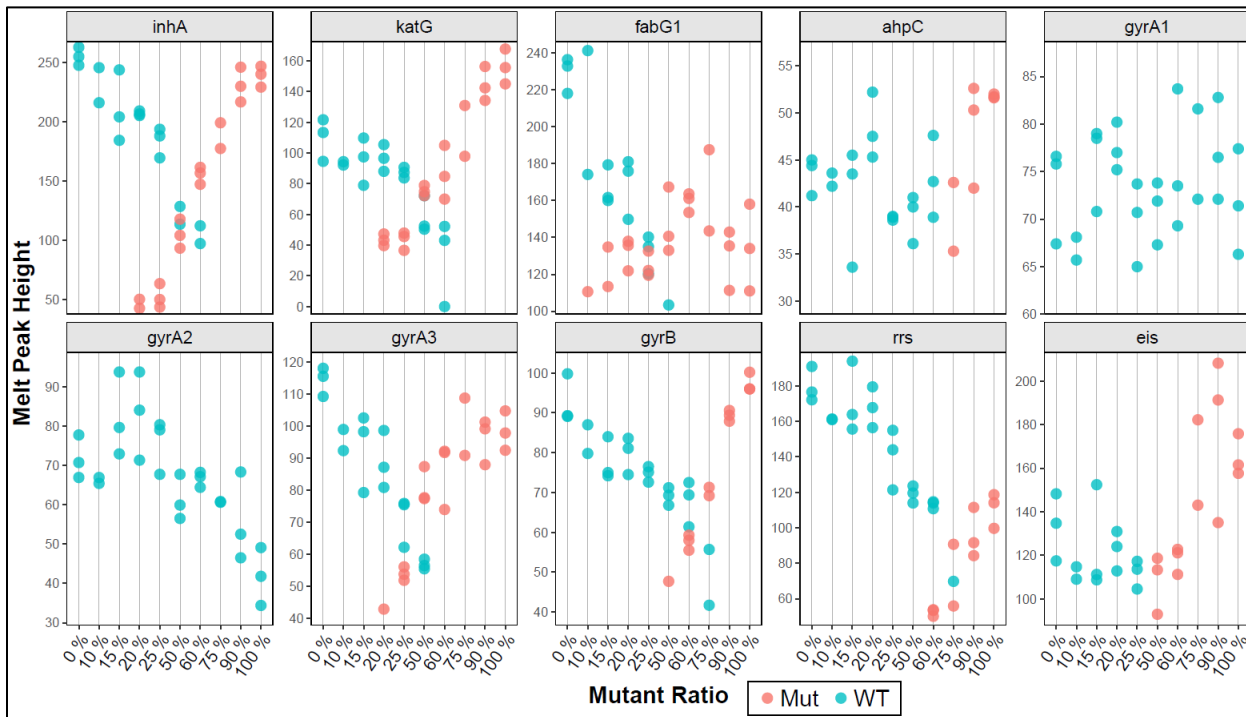

719

720 **Figure 2:** Melt peak heights of each target in mixtures containing different ratios of cells containing WT and  
721 mutant plasmids respectively, where blue dots indicate a susceptible call and red dots indicate mutant calls  
722 based on their  $T_m$  and melt peak height. The melt peak height is determined by highest distance between the  
723 peak of the first derivative melt curve and baseline. The presence of blue and red dots for any concentration  
724 designates detection of both a WT and a mutant  $T_m$ . In such cases the results obtained was “RESISTANCE  
725 DETECTED” for the corresponding drug. The QRDR mutation D94G generates a mutant  $T_m$  only with the  
726 *gyrA3* probe. Each mixture was tested in triplicate, except the 10% and 75% mixtures, which had two valid  
727 replicates.

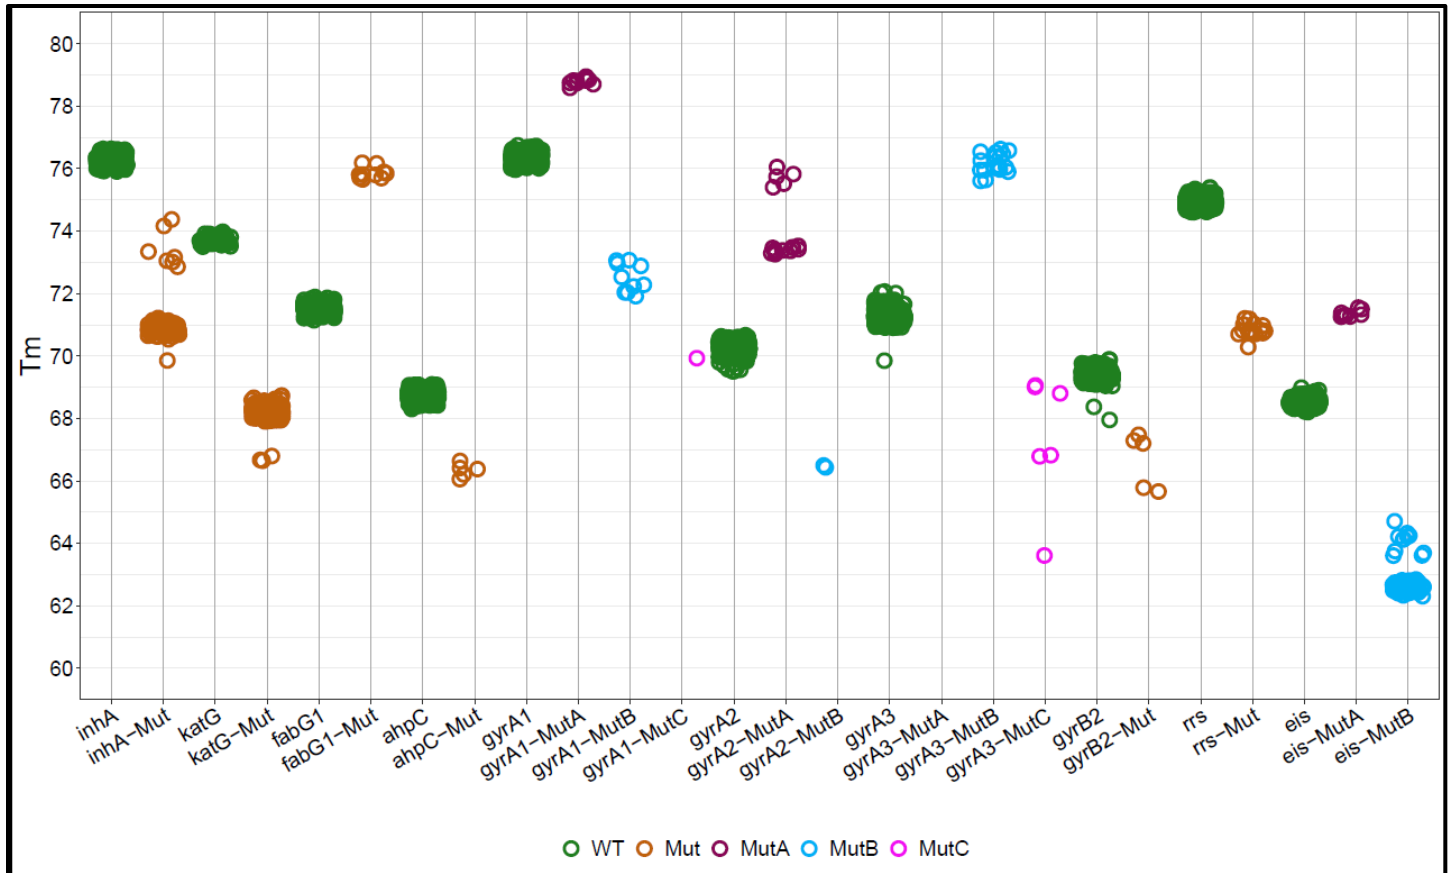

728

729

730

731

732

733

**Figure 3:** Scatterplot showing clustering of WT and mutant T<sub>m</sub> values from Clinical study with 100 *M. tuberculosis* positive frozen sputum and 214 clinical isolates for all Xpert MTB/XDR targets using ggplot on R studio. To prevent over plotting, a degree of jitter was introduced. All green dots are WT T<sub>m</sub> while brown, purple, blue and pink are mutant T<sub>m</sub> values.
